# Supplementary material
Source: PubMed Central journal article supplement (PMC2736871)
Supplement: NIHMS140055-supplement-supFig_5.pdf [file NIHMS140055-supplement-supFig_5.pdf]

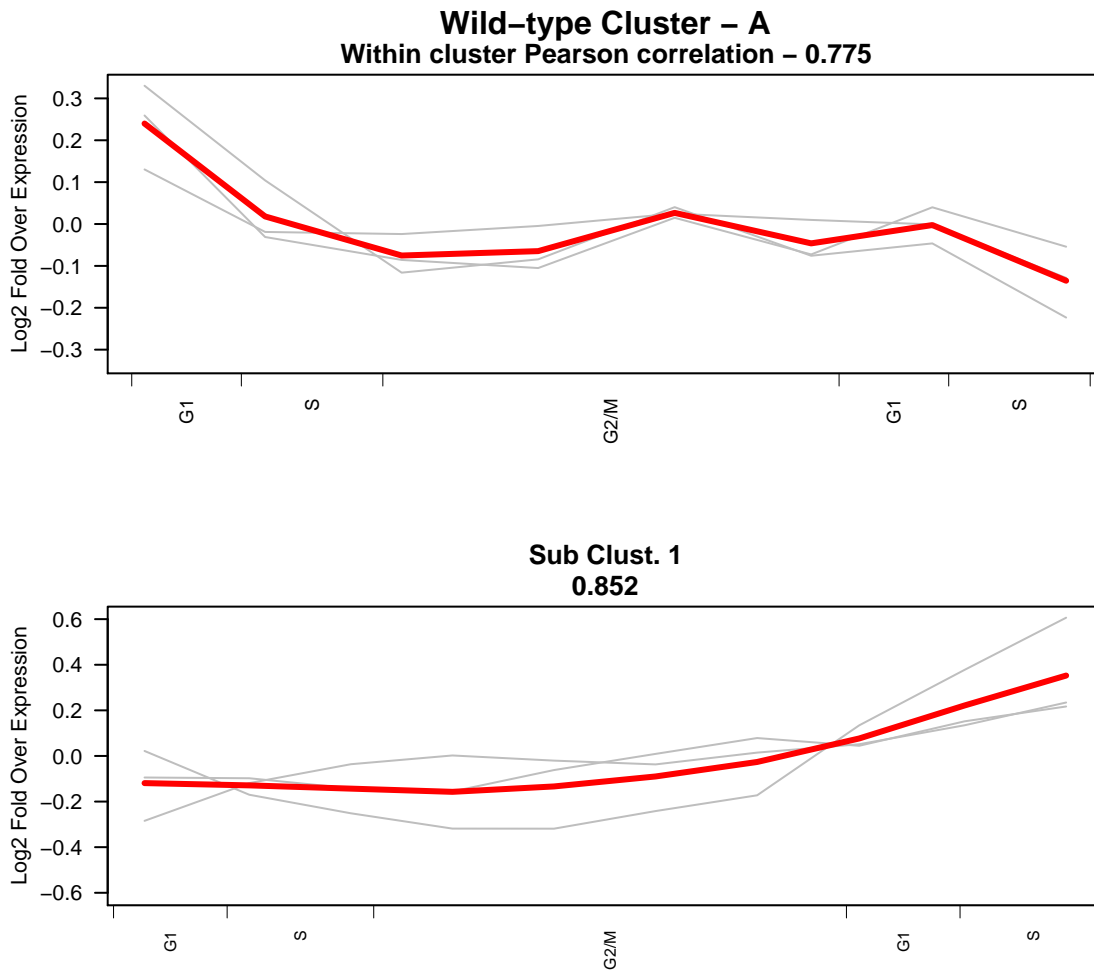

Centroids of clusters from Figure 3

**Figure S5 | Transcript profiles within each wild-type cluster and cyclin mutant sub-cluster from Fig. 3 display high Pearson correlation.** The top panel of each page displays the wild-type log<sub>2</sub>-fold change expression profile for each gene (gray lines) in a particular wild-type cluster, overlaid with that cluster’s centroid (red line). The bottom panel(s) display the cyclin mutant log<sub>2</sub>-fold change expression profiles (gray lines) and centroids (red line) for all genes in each subcluster associated with the wild-type cluster. Each panel is annotated with the cluster or subcluster name (as labeled in Fig. 3), as well as the average Pearson correlation between all genes displayed in the panel. The list of genes in each cluster/subcluster can be found in Supplementary Table 1.

**Wild-type Cluster - B**  
Within cluster Pearson correlation - 0.625

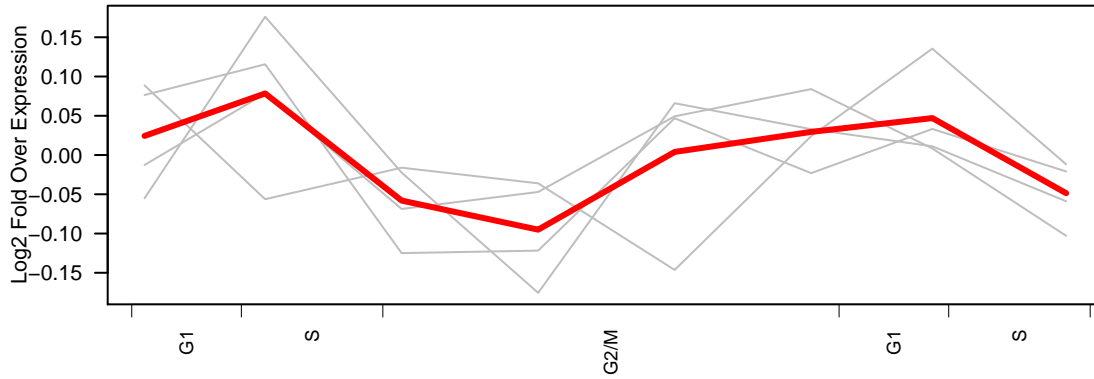

**Sub Clust. 2**  
0.762

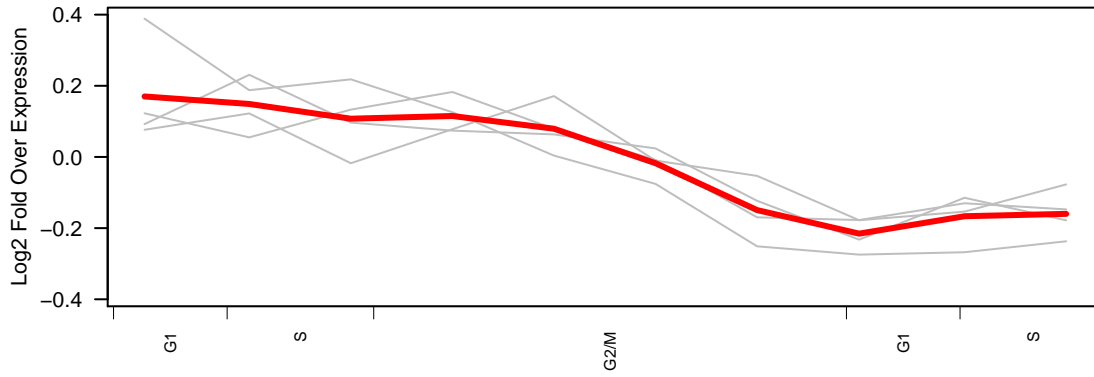

Centroids of clusters from Figure 3

**Wild-type Cluster - C**  
Within cluster Pearson correlation - 0.811

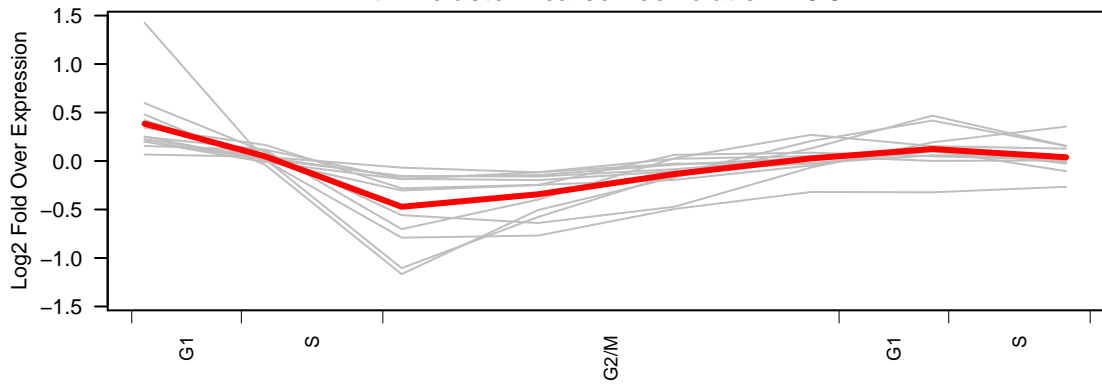

**Sub Clust. 3**  
0.736

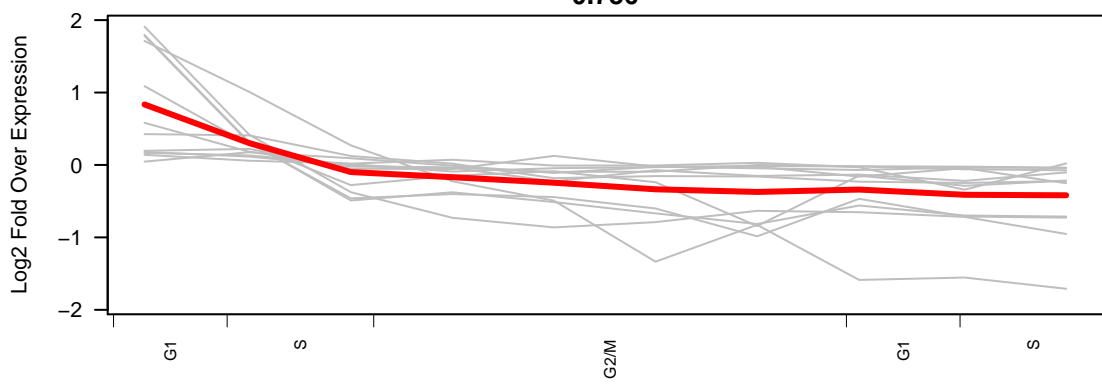

Centroids of clusters from Figure 3

**Wild-type Cluster - D**  
Within cluster Pearson correlation - 0.817

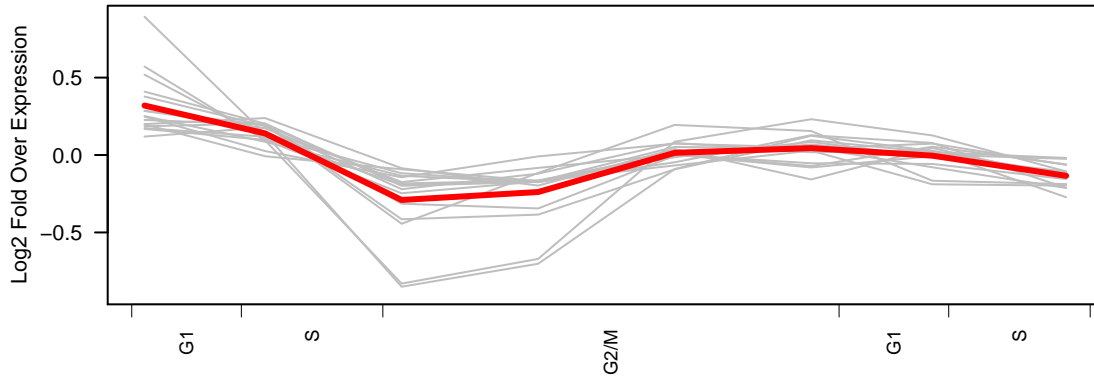

**Sub Clust. 4**  
0.753

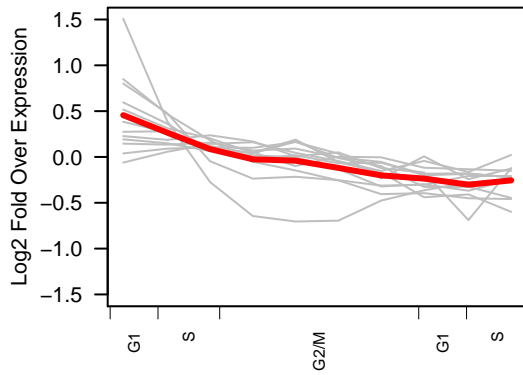

**Sub Clust. 5**  
0.934

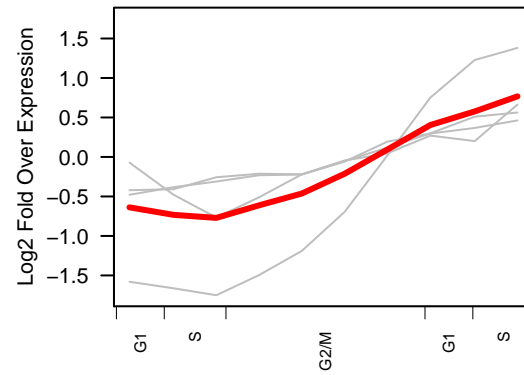

Centroids of clusters from Figure 3

**Wild-type Cluster – E**  
Within cluster Pearson correlation – 0.872

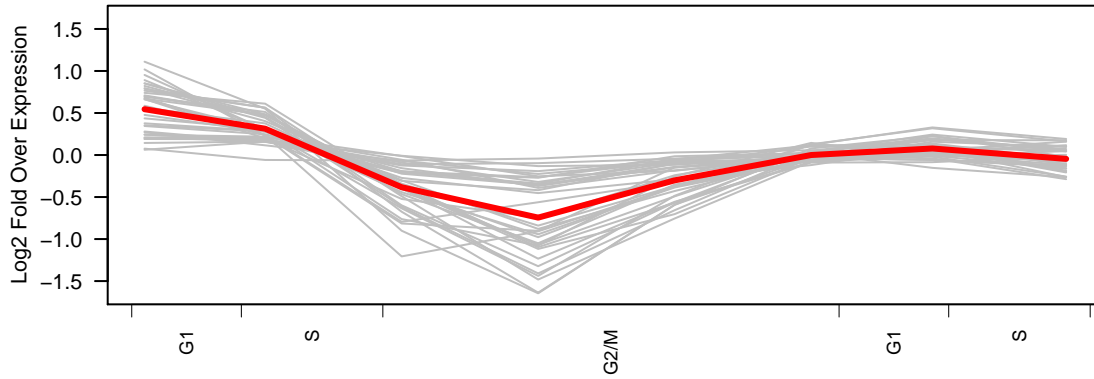

**Sub Clust. 6**  
0.804

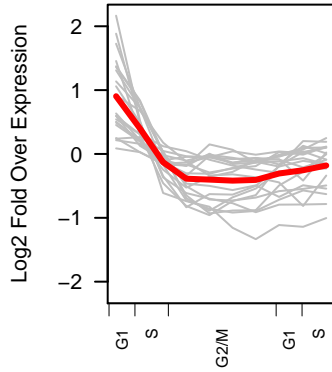

**Sub Clust. 7**  
0.754

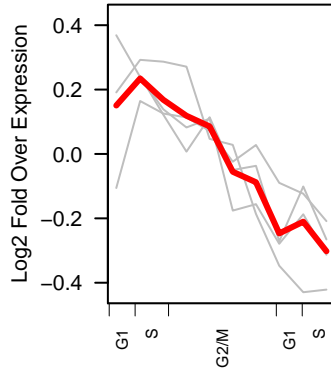

**Sub Clust. 8**  
0.765

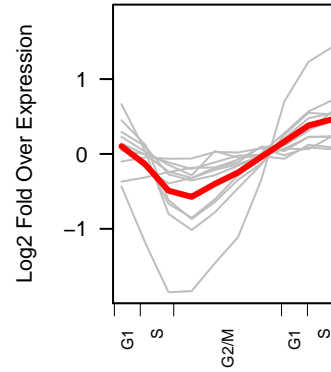

Centroids of clusters from Figure 3

**Wild-type Cluster – F**  
 Within cluster Pearson correlation – 0.889

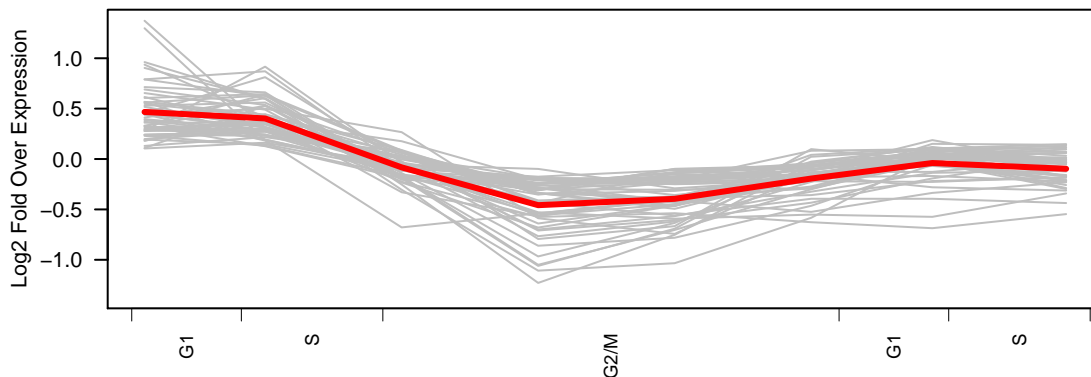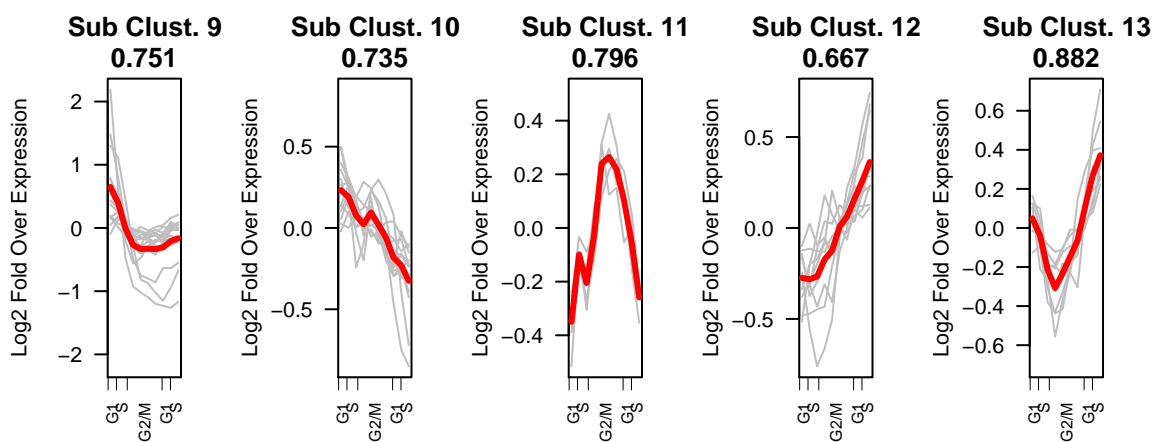

Centroids of clusters from Figure 3

**Wild-type Cluster - G**  
Within cluster Pearson correlation - 0.871

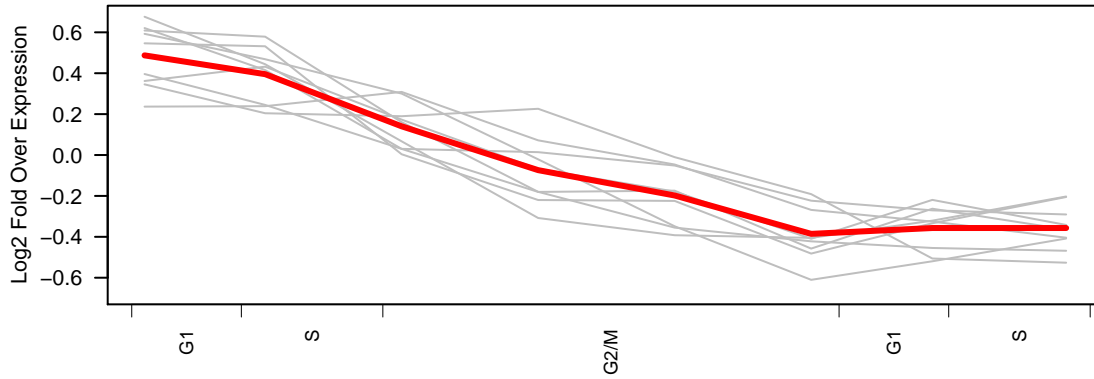

**Sub Clust. 14**  
0.697

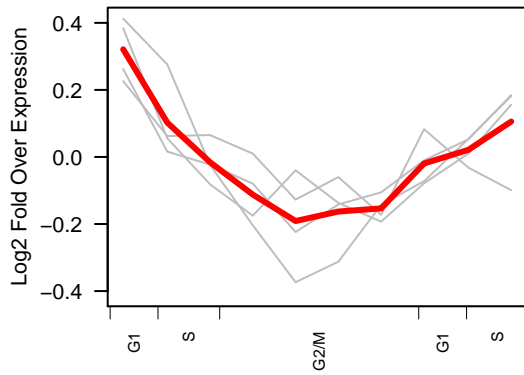

**Sub Clust. 15**  
0.674

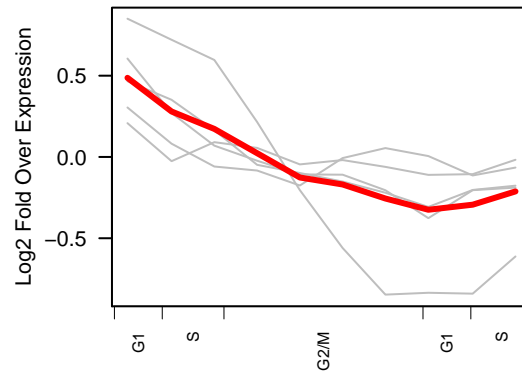

Centroids of clusters from Figure 3

**Wild-type Cluster - H**  
Within cluster Pearson correlation - 0.665

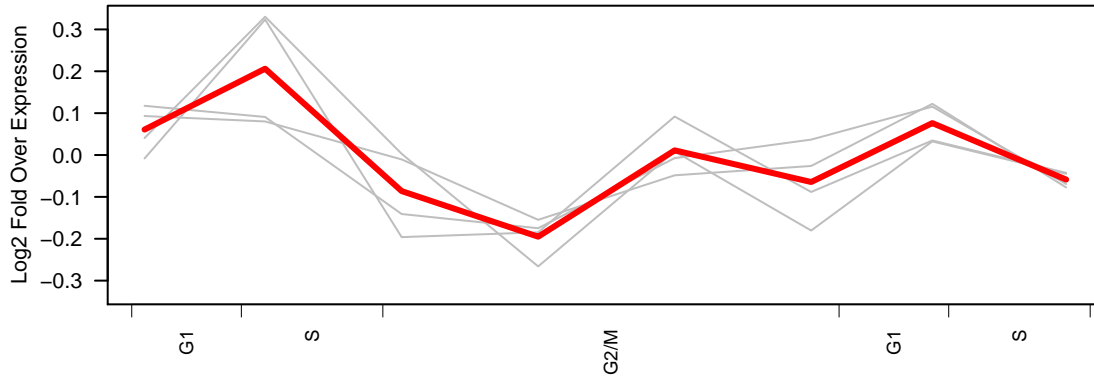

**Sub Clust. 16**  
0.944

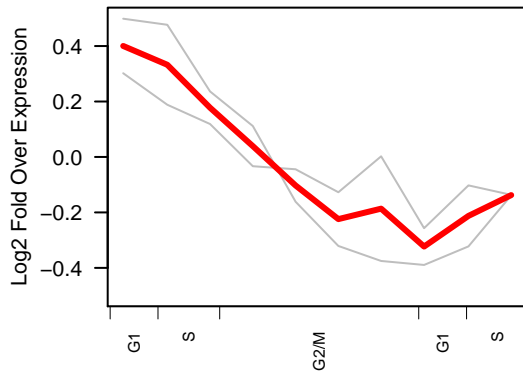

**Sub Clust. 17**  
0.736

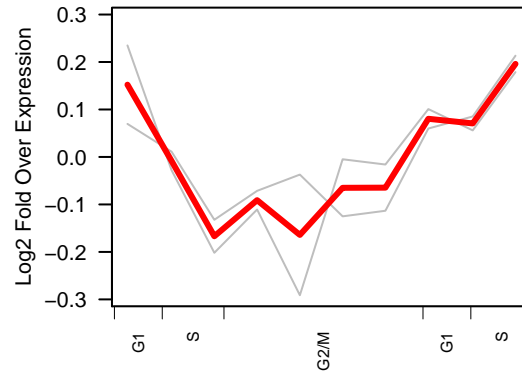

Centroids of clusters from Figure 3



**Wild-type Cluster – I**  
Within cluster Pearson correlation – 0.892

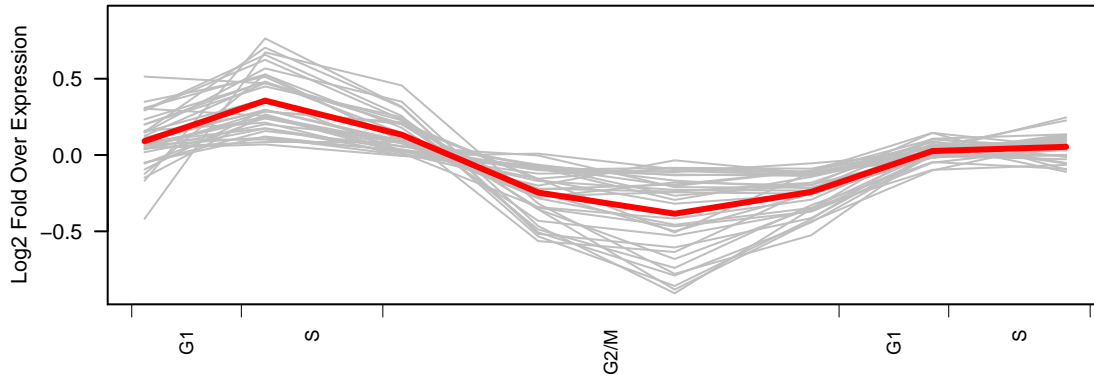

**Sub Clust. 18**  
0.791

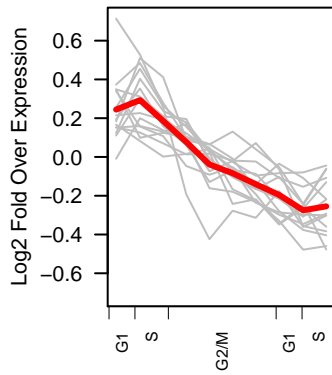

**Sub Clust. 19**  
0.811

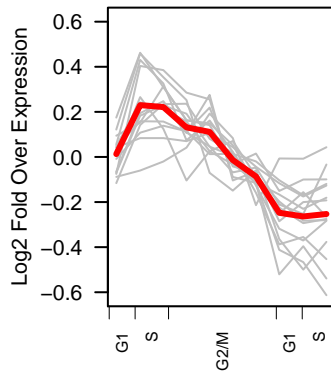

**Sub Clust. 20**  
0.887

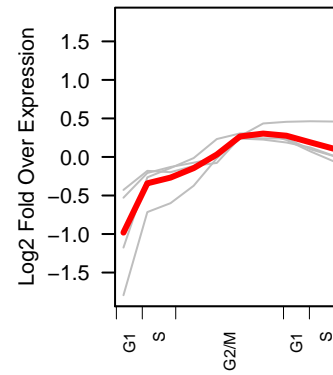

Centroids of clusters from Figure 3

**Wild-type Cluster – J**  
Within cluster Pearson correlation – 0.68

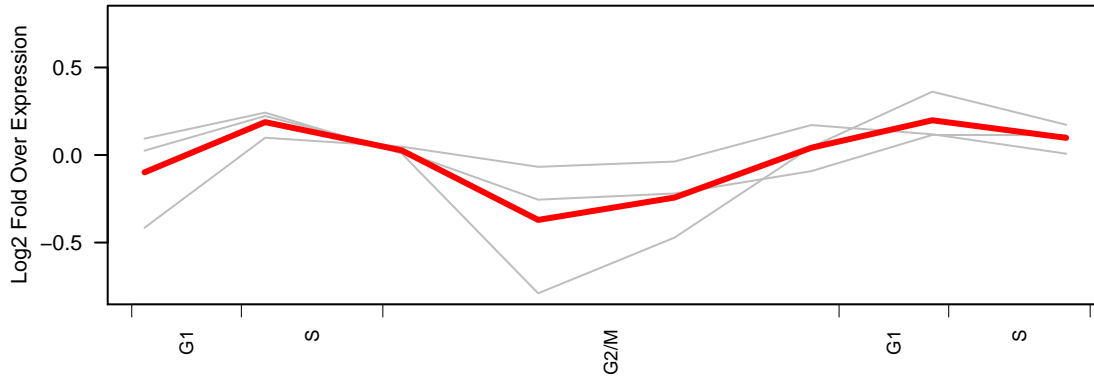

**Sub Clust. 21**  
**0.904**

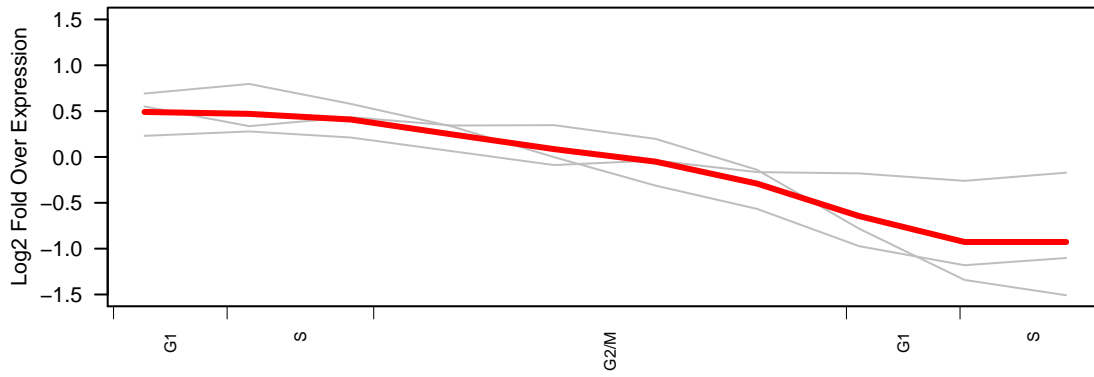

Centroids of clusters from Figure 3

**Wild-type Cluster – K**  
Within cluster Pearson correlation – 0.863

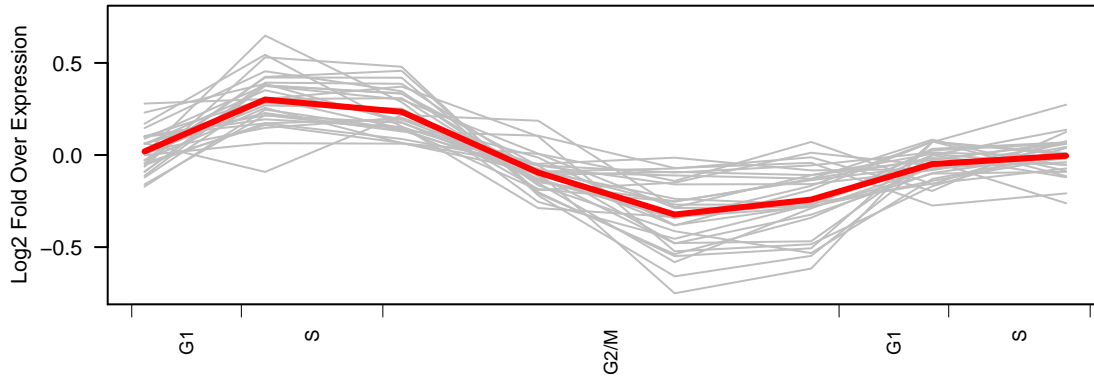

**Sub Clust. 22**  
0.757

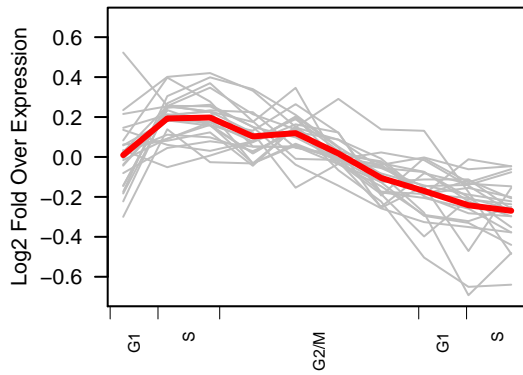

**Sub Clust. 23**  
0.734

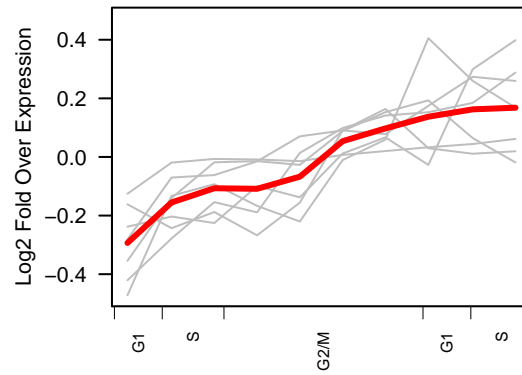

Centroids of clusters from Figure 3

**Wild-type Cluster - L**  
Within cluster Pearson correlation - 0.899

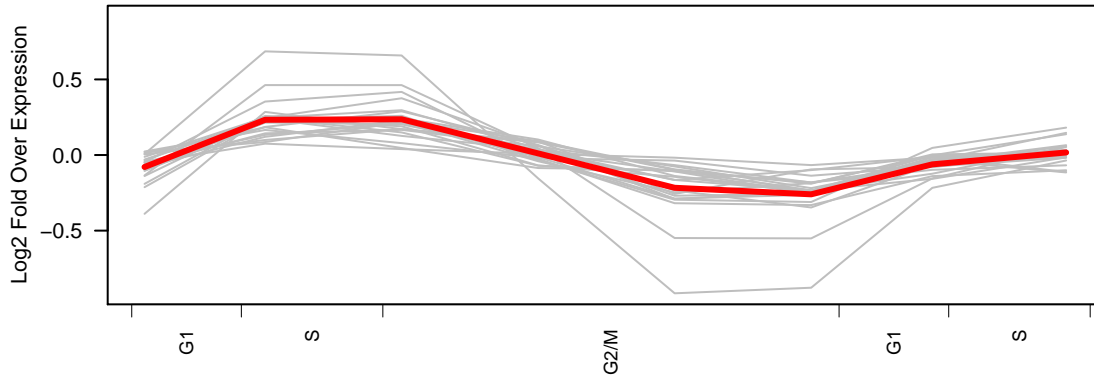

**Sub Clust. 24**  
0.85

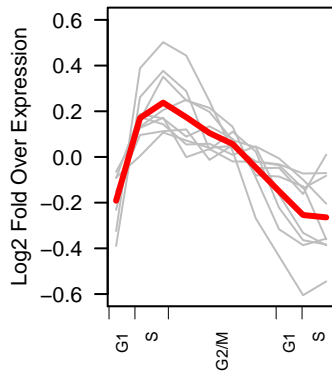

**Sub Clust. 25**  
0.723

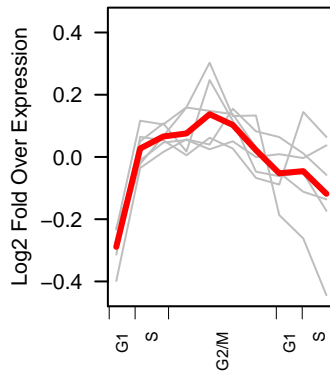

**Sub Clust. 26**  
0.802

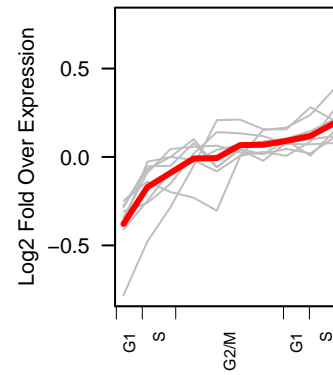

Centroids of clusters from Figure 3

**Wild-type Cluster – M**  
Within cluster Pearson correlation – 0.772

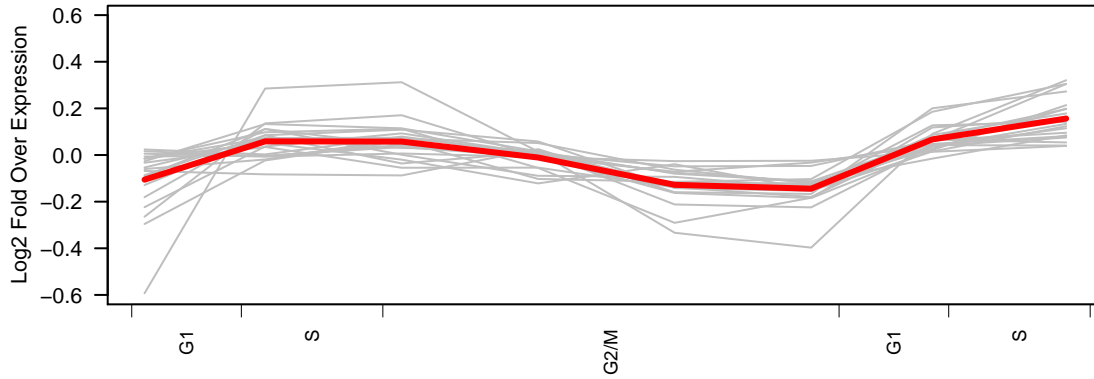

**Sub Clust. 27**  
0.812

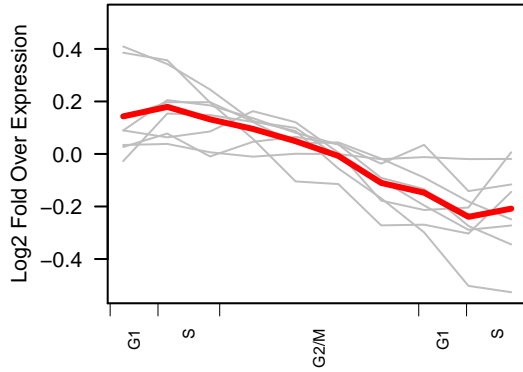

**Sub Clust. 28**  
0.834

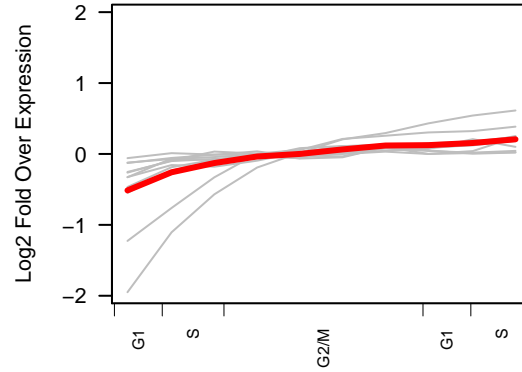

Centroids of clusters from Figure 3

**Wild-type Cluster - N**  
Within cluster Pearson correlation - 0.835

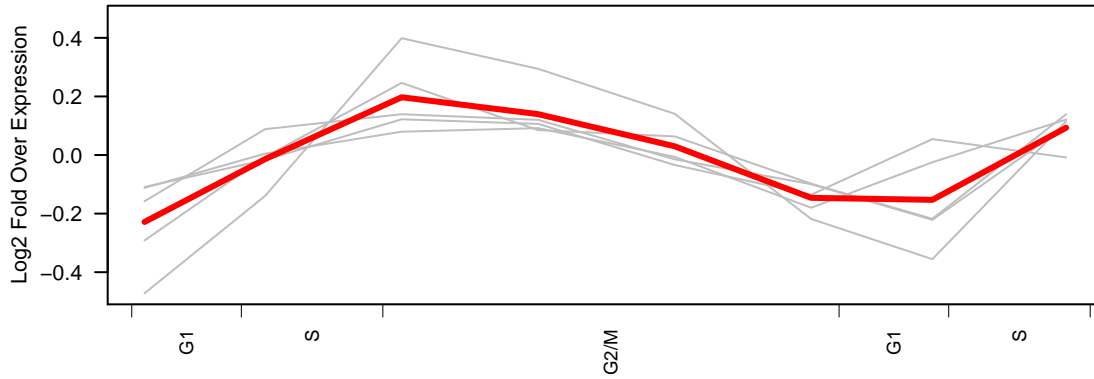

**Sub Clust. 29**  
**0.784**

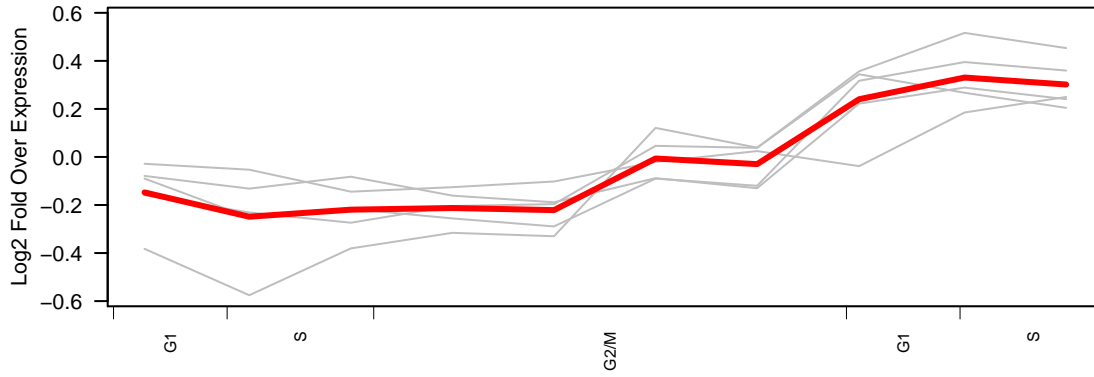

Centroids of clusters from Figure 3

**Wild-type Cluster - O**  
Within cluster Pearson correlation - 0.911

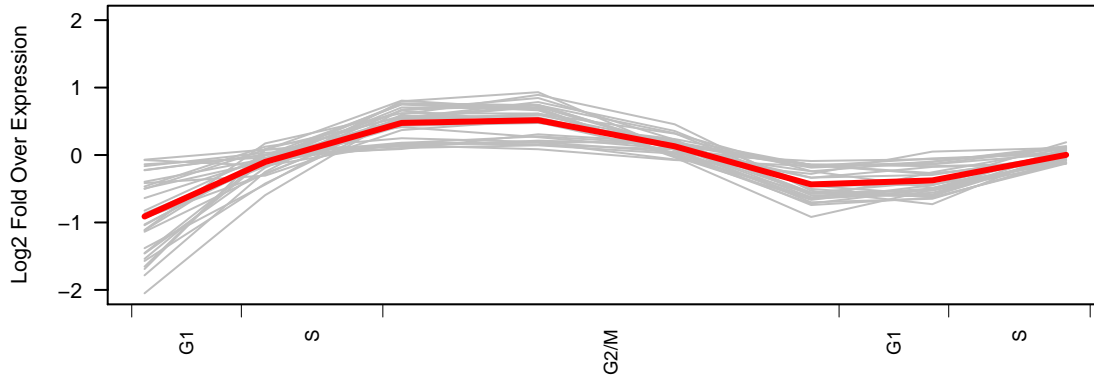

**Sub Clust. 30**  
**0.739**

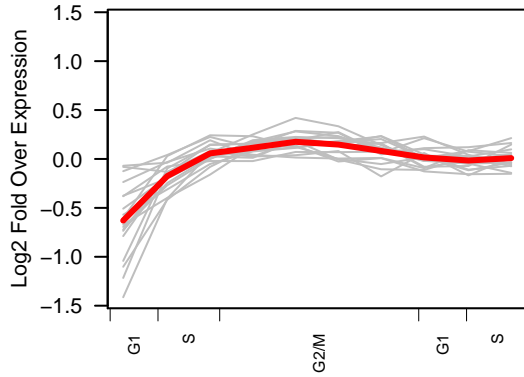

**Sub Clust. 31**  
**0.661**

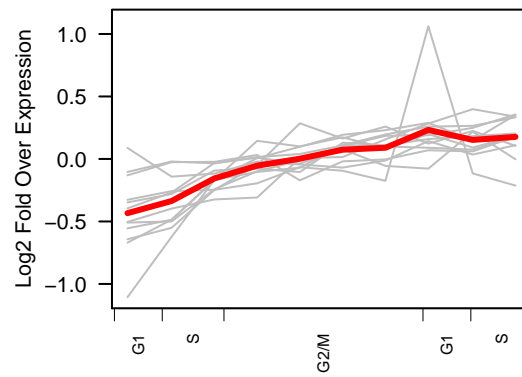

Centroids of clusters from Figure 3

**Wild-type Cluster - P**  
Within cluster Pearson correlation - 0.778

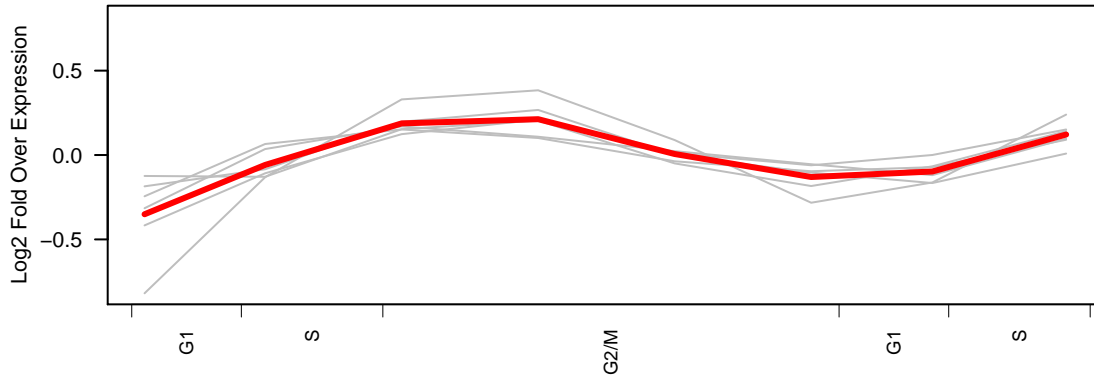

**Sub Clust. 32**  
0.827

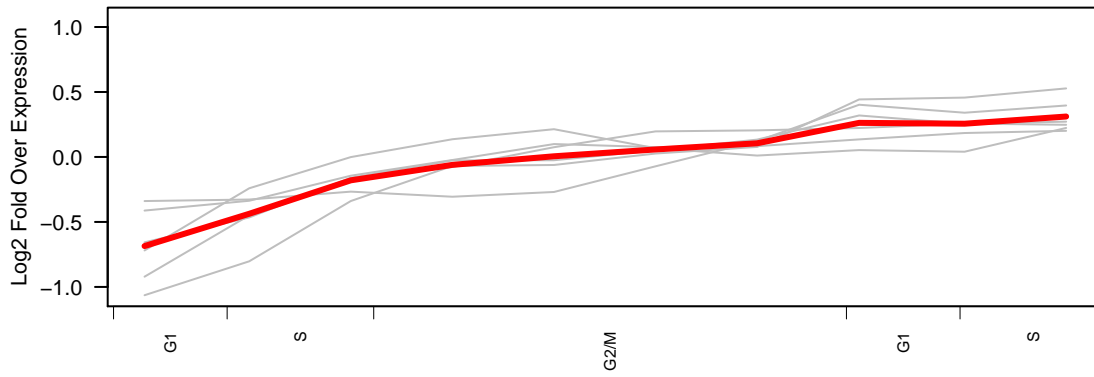

Centroids of clusters from Figure 3



**Wild-type Cluster - Q**  
Within cluster Pearson correlation - 0.742

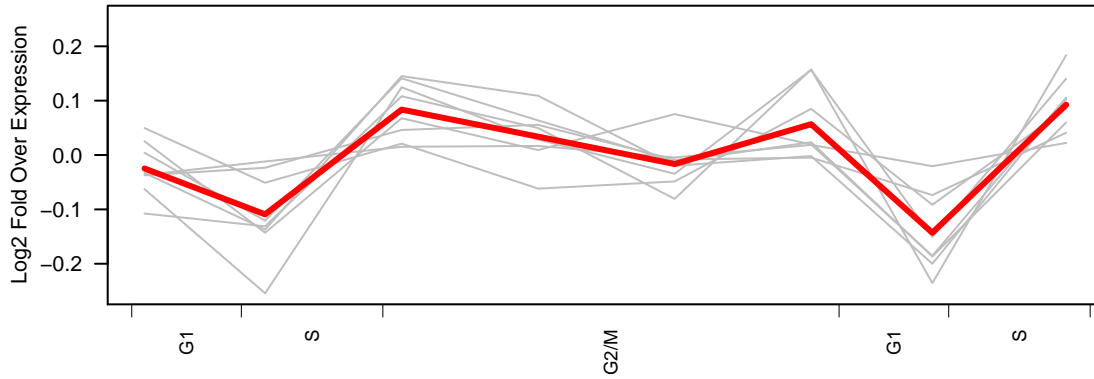

**Sub Clust. 33**  
0.666

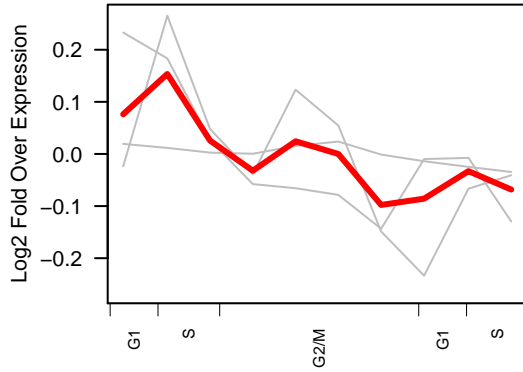

**Sub Clust. 34**  
0.721

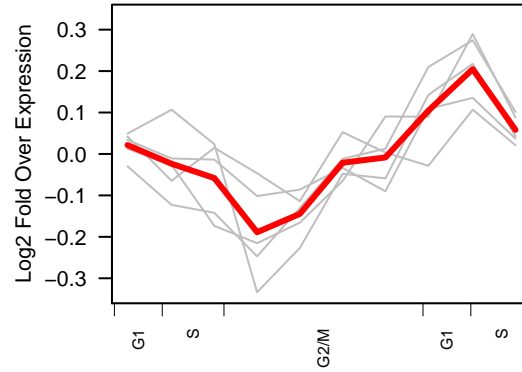

Centroids of clusters from Figure 3

**Wild-type Cluster - R**  
Within cluster Pearson correlation - 0.871

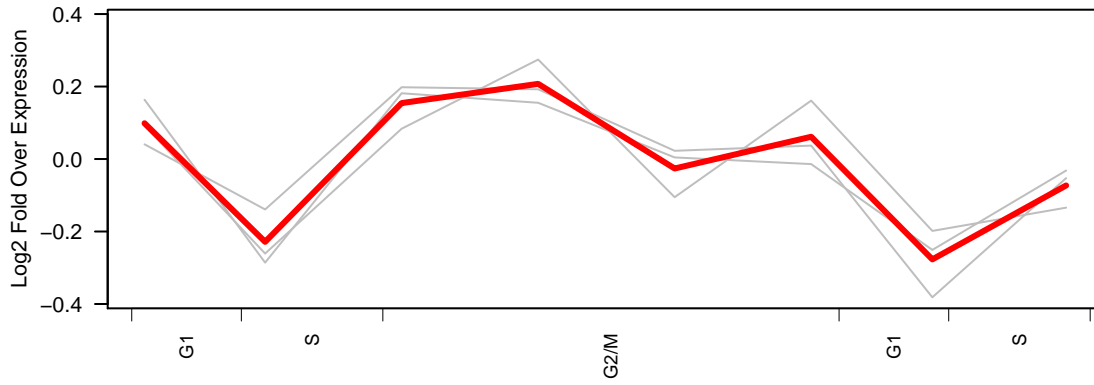

**Sub Clust. 35**  
0.678

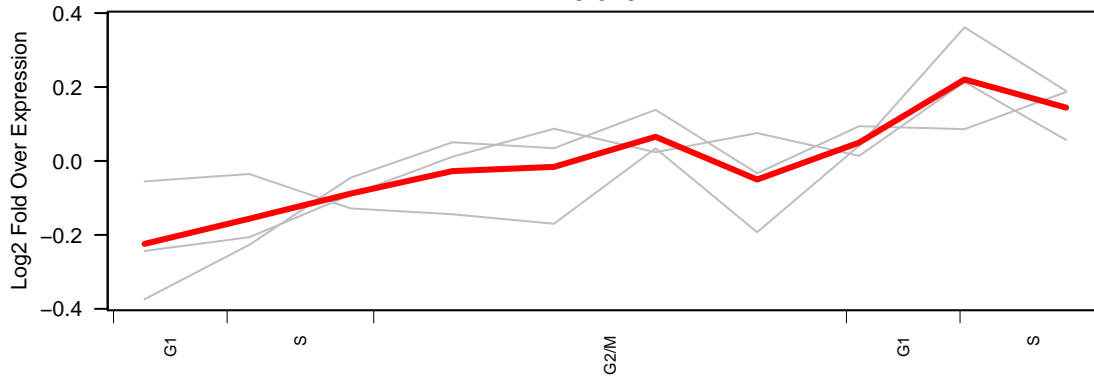

Centroids of clusters from Figure 3

**Wild-type Cluster - S**  
Within cluster Pearson correlation - 0.73

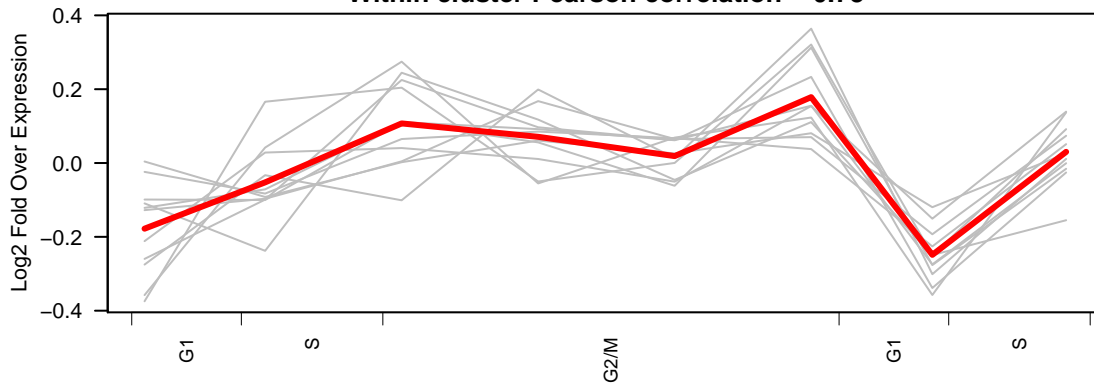

**Sub Clust. 36**  
0.69

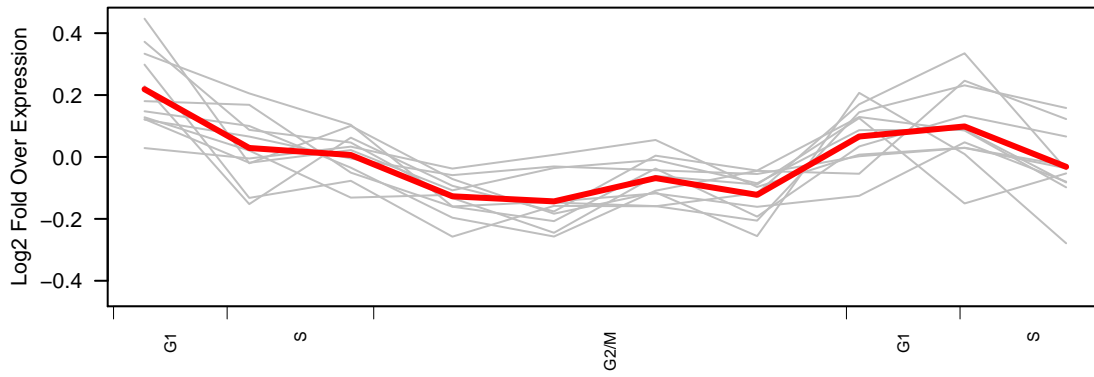

Centroids of clusters from Figure 3

**Wild-type Cluster - T**  
Within cluster Pearson correlation - 0.674

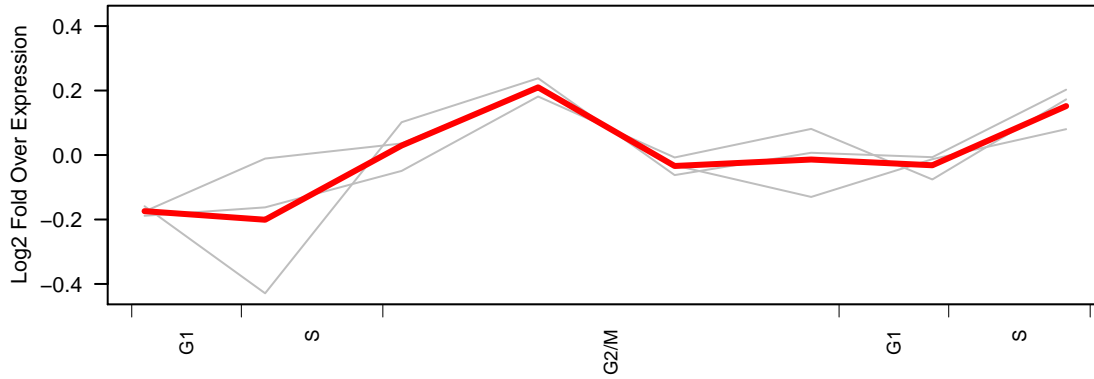

**Sub Clust. 37**  
0.848

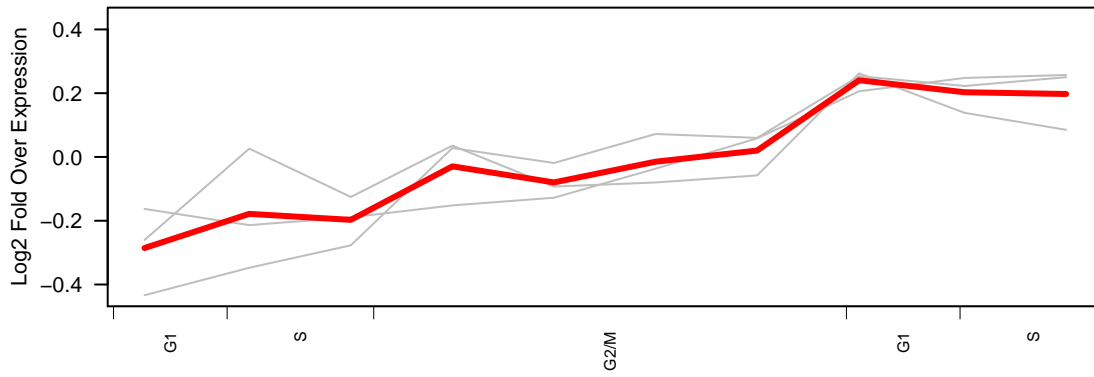

Centroids of clusters from Figure 3

**Wild-type Cluster - U**  
Within cluster Pearson correlation - 0.73

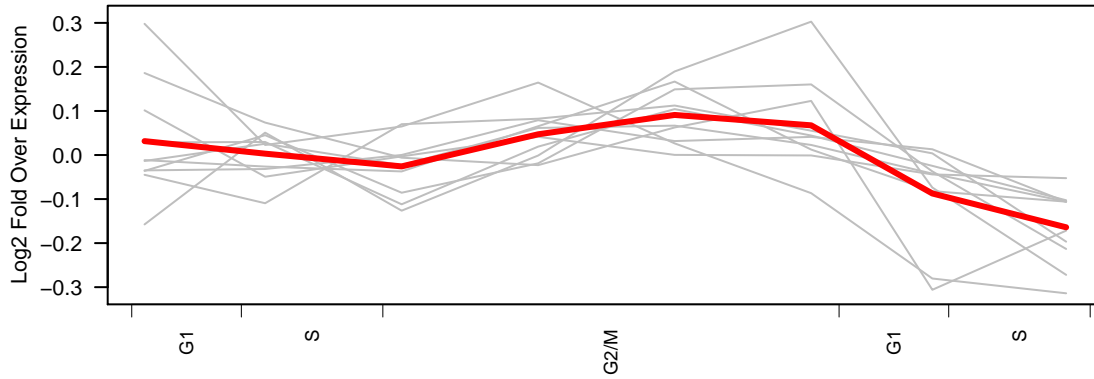

**Sub Clust. 38**  
0.698

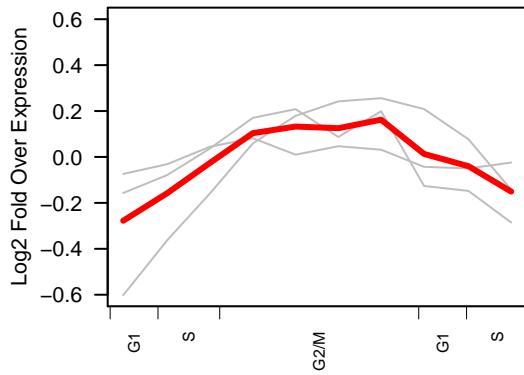

**Sub Clust. 39**  
0.829

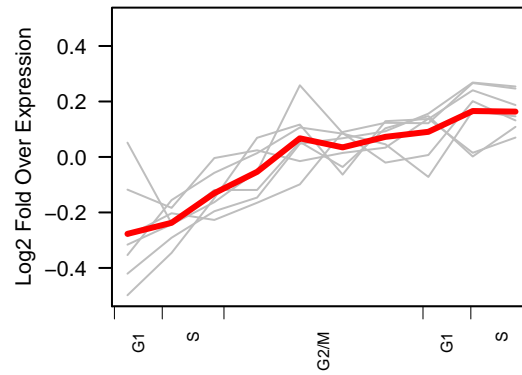

Centroids of clusters from Figure 3

**Wild-type Cluster - V**  
Within cluster Pearson correlation - 0.845

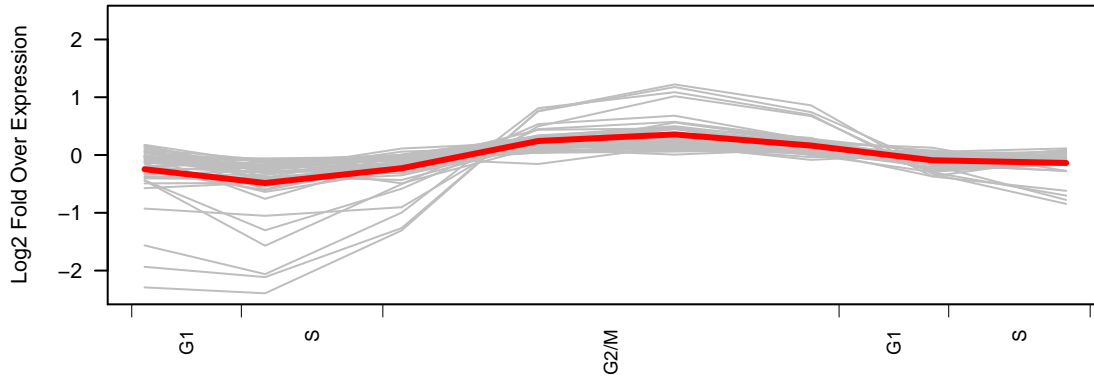

**Sub Clust. 40**  
**0.848**

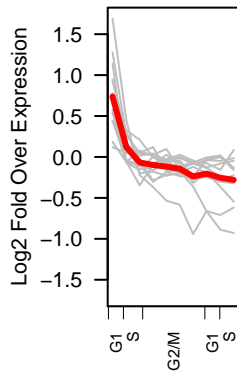

**Sub Clust. 41**  
**0.669**

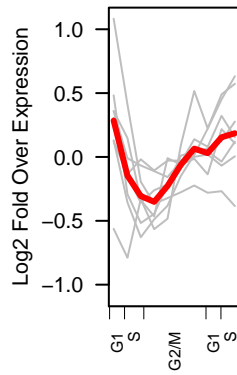

**Sub Clust. 42**  
**0.872**

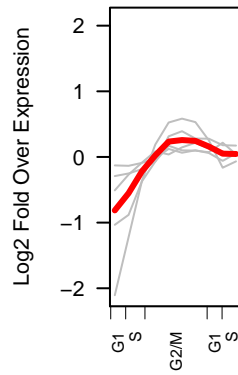

**Sub Clust. 43**  
**0.872**

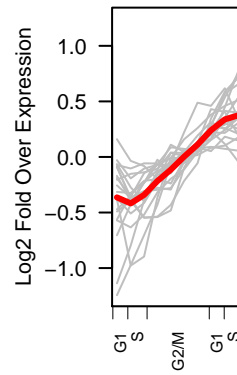

Centroids of clusters from Figure 3

**Wild-type Cluster – W**  
Within cluster Pearson correlation – 0.869

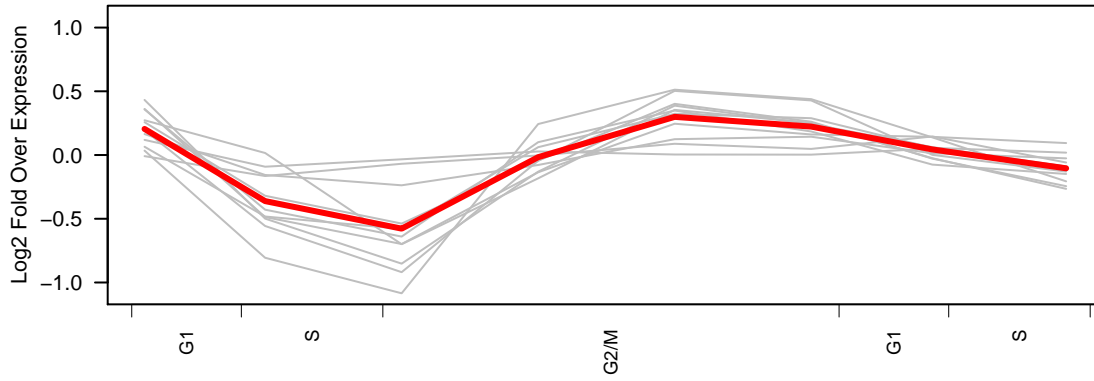

**Sub Clust. 44**  
0.825

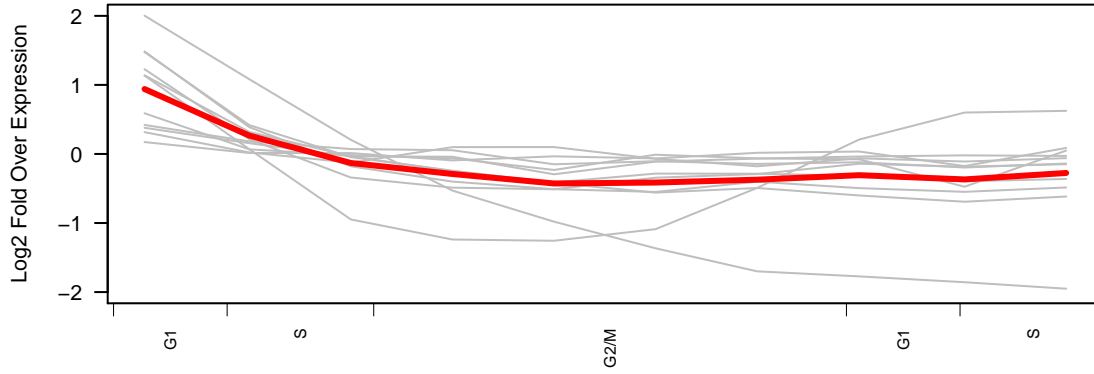

Centroids of clusters from Figure 3

**Wild-type Cluster - X**  
Within cluster Pearson correlation - 0.794

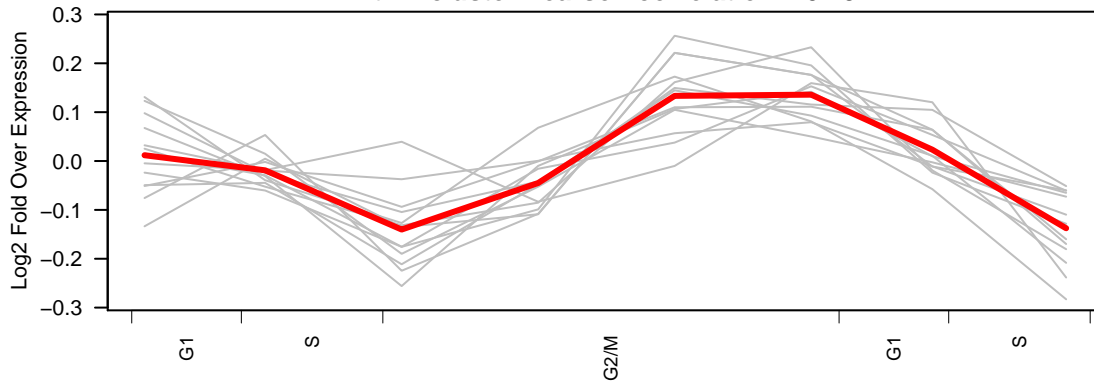

**Sub Clust. 45**  
0.689

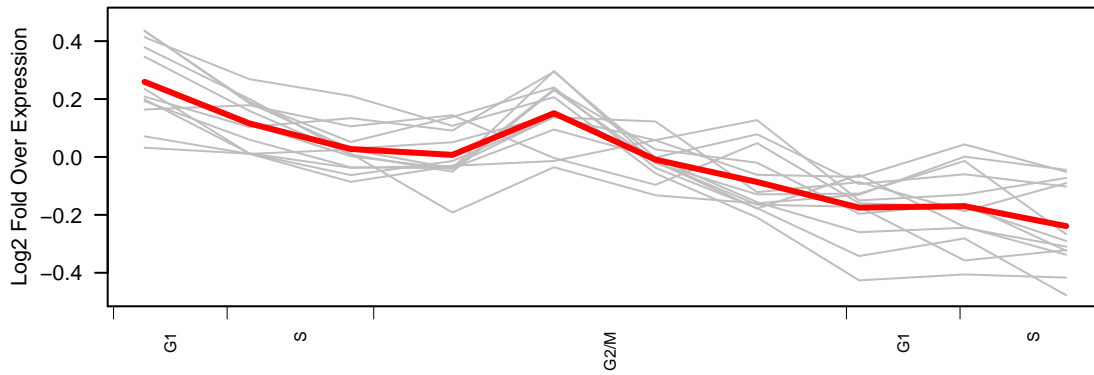

Centroids of clusters from Figure 3



**Wild-type Cluster - Y**  
Within cluster Pearson correlation - 0.737

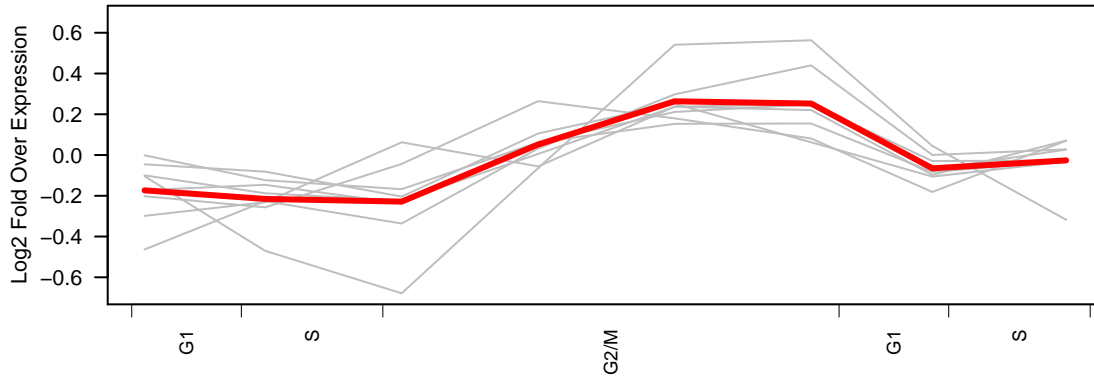

**Sub Clust. 46**  
0.855

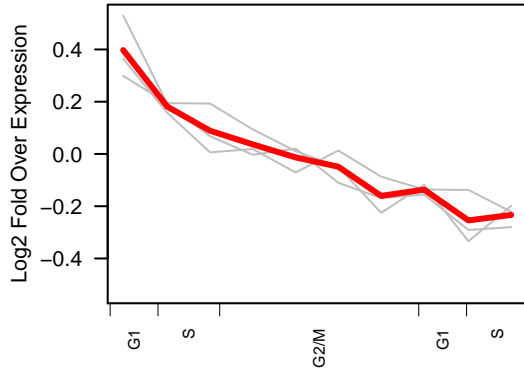

**Sub Clust. 47**  
0.904

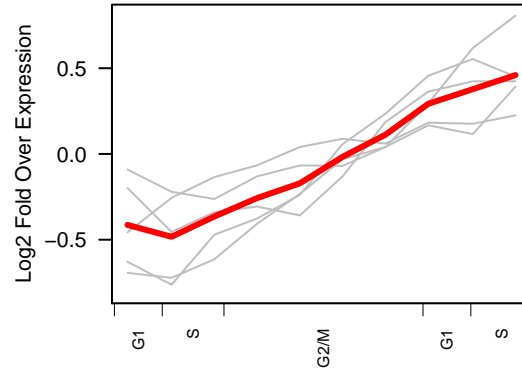

Centroids of clusters from Figure 3

**Wild-type Cluster - Z**  
Within cluster Pearson correlation - 0.925

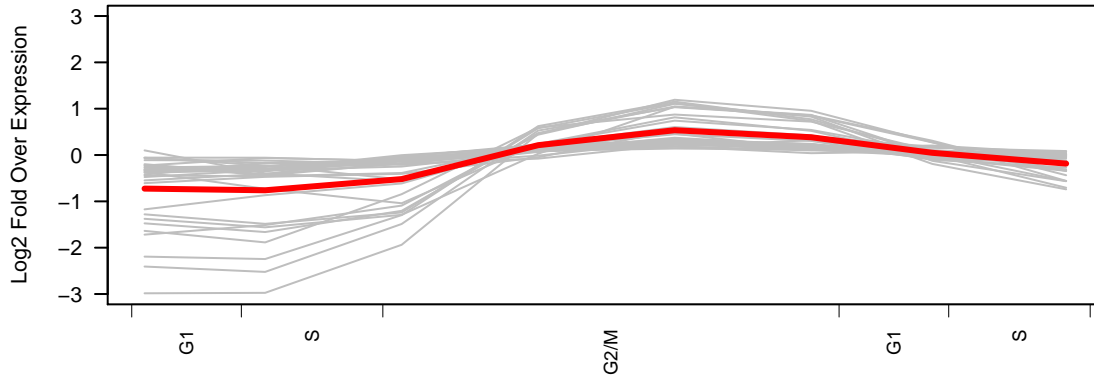

**Sub Clust. 48**  
0.851

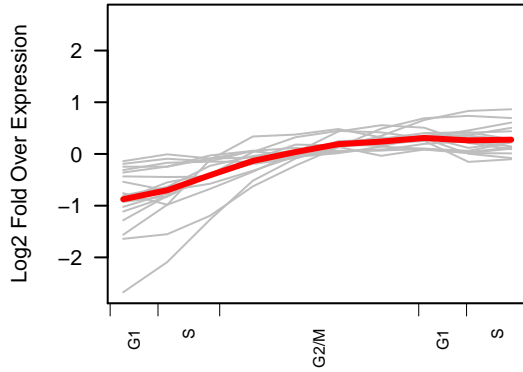

**Sub Clust. 49**  
0.854

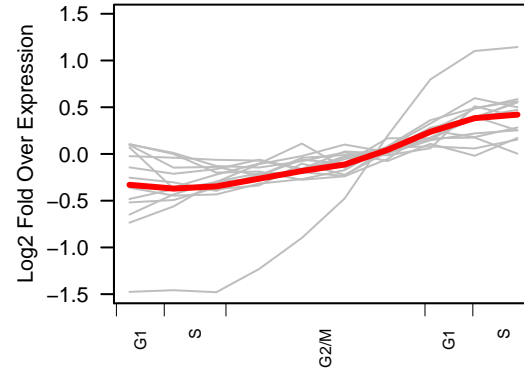

Centroids of clusters from Figure 3

**Wild-type Cluster – AA**  
Within cluster Pearson correlation – 0.868

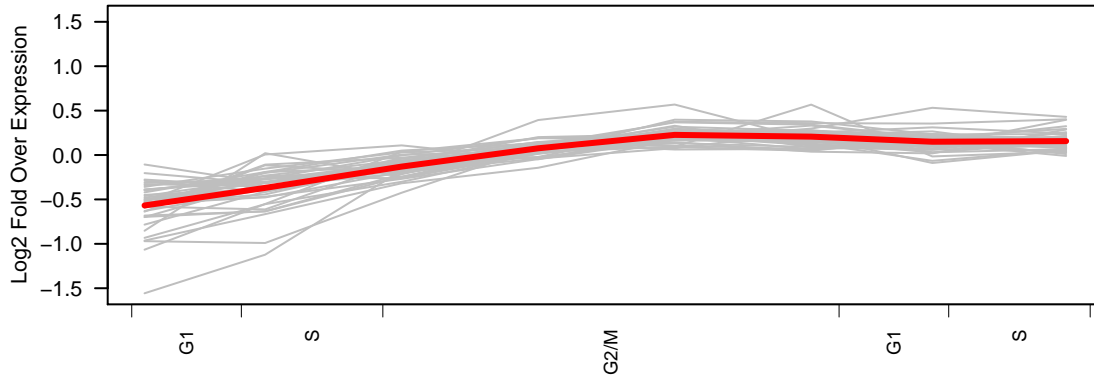

**Sub Clust. 50**  
0.806

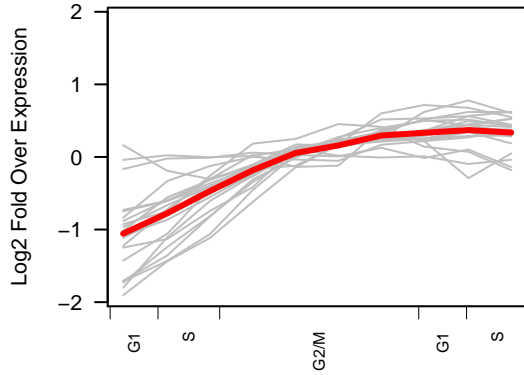

**Sub Clust. 51**  
0.932

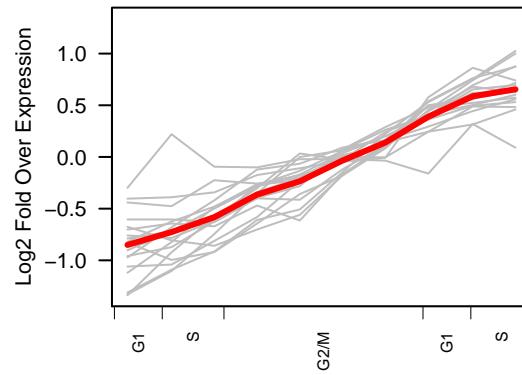

Centroids of clusters from Figure 3

**Wild-type Cluster – AB**  
Within cluster Pearson correlation – 0.931

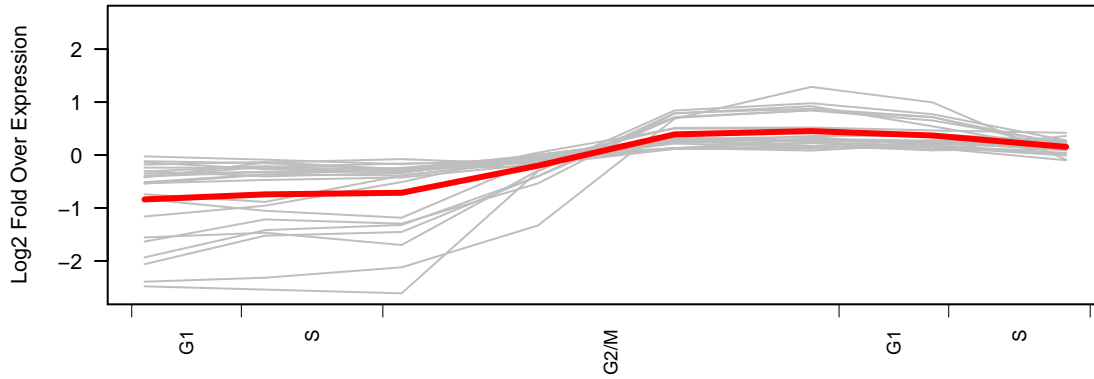

**Sub Clust. 52**  
**0.831**

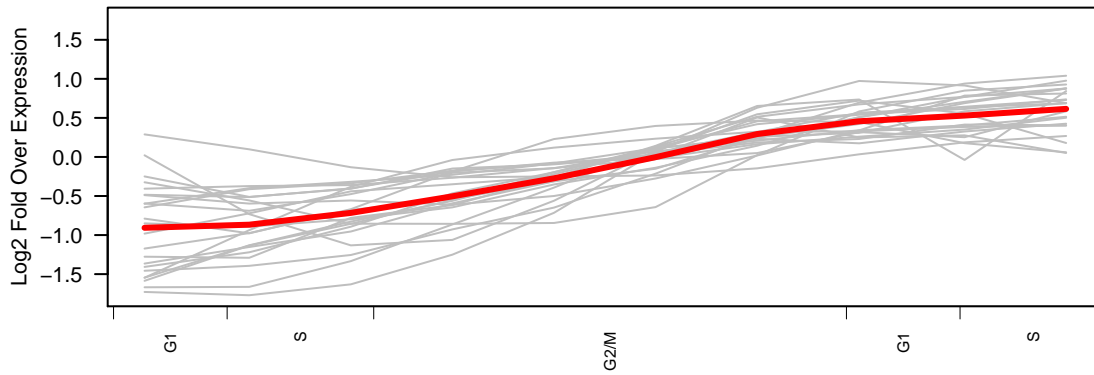

Centroids of clusters from Figure 3

**Wild-type Cluster – AC**  
Within cluster Pearson correlation – 0.905

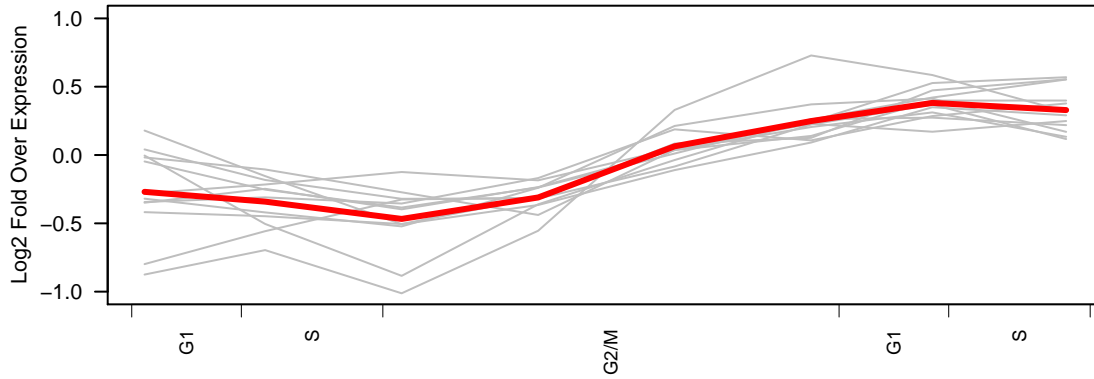

**Sub Clust. 53**  
0.763

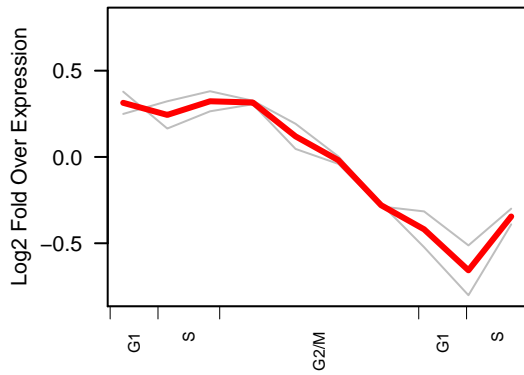

**Sub Clust. 54**  
0.685

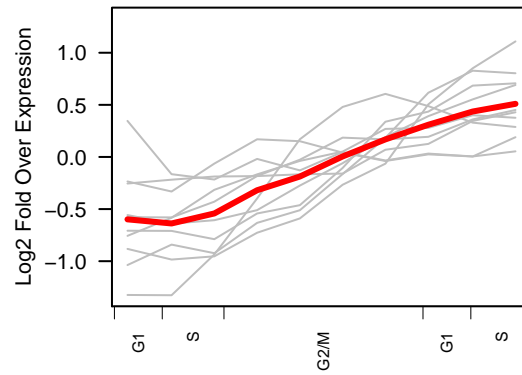

Centroids of clusters from Figure 3

**Wild-type Cluster – AD**  
Within cluster Pearson correlation – 0.665

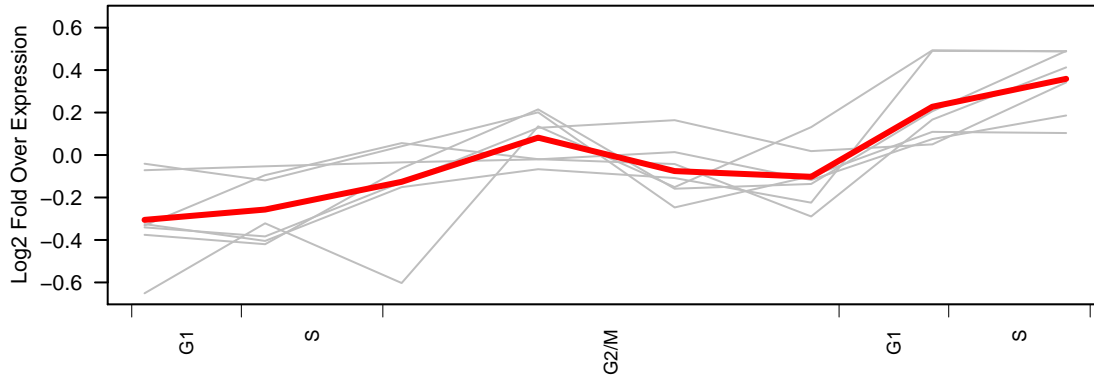

**Sub Clust. 55**  
0.729

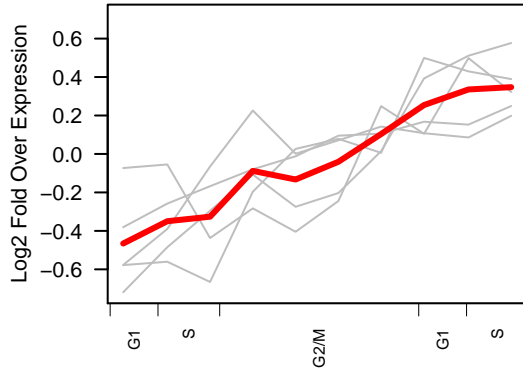

**Sub Clust. 56**  
0.972

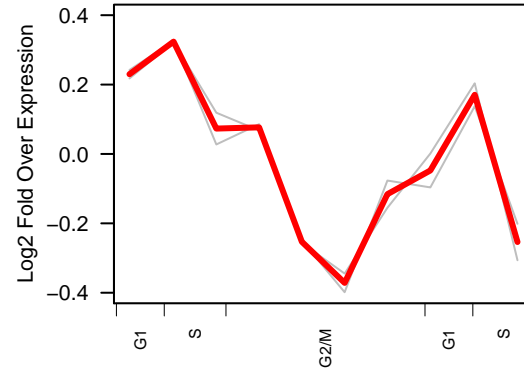

Centroids of clusters from Figure 3
