# Supplementary material
Source: PubMed Central journal article supplement (PMC2736871)
Supplement: NIHMS140055-supplement-supFig_16.pdf [file NIHMS140055-supplement-supFig_16.pdf]

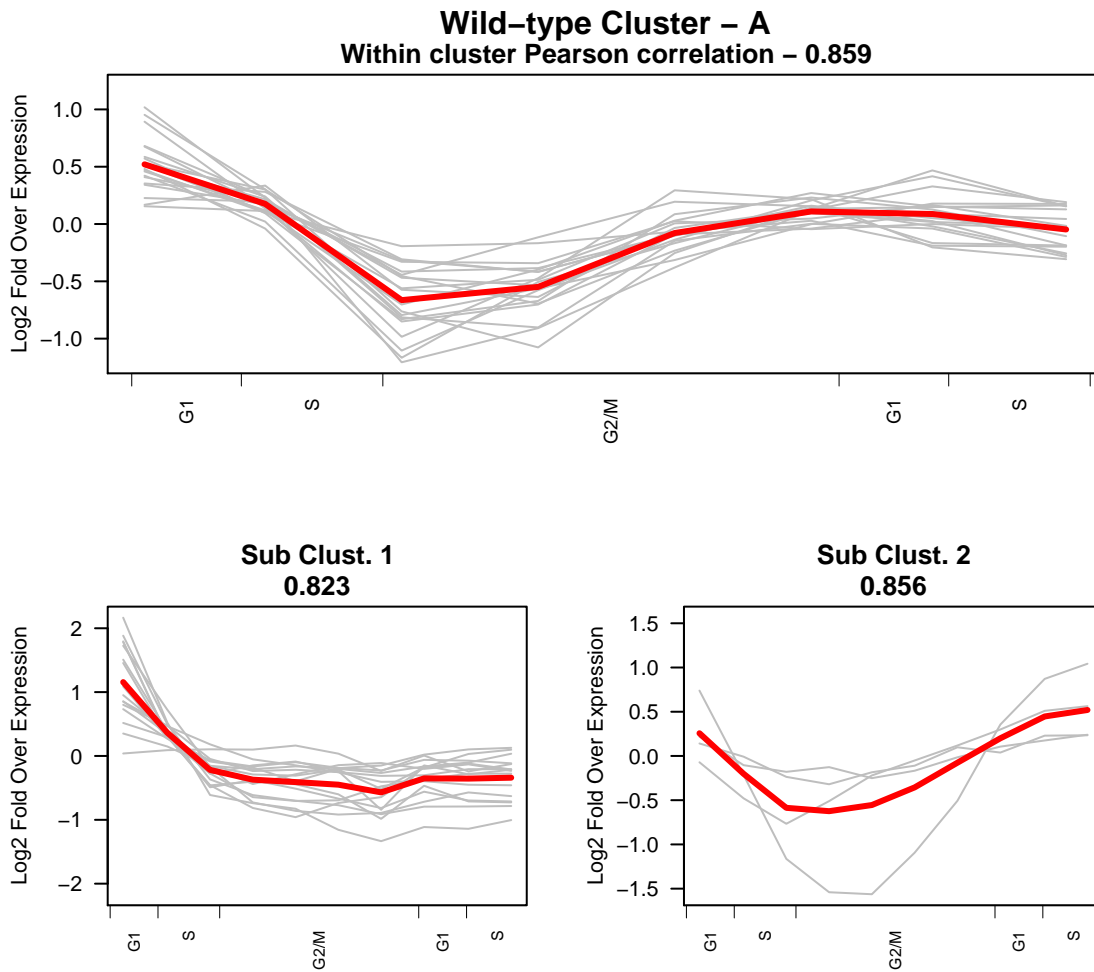

Centroids of clusters from Supplementary Fig. 15

**Figure S16 | Transcript profiles within each wild-type cluster and cyclin mutant sub-cluster from Supplementary Fig. 15 display high Pearson correlation.** The top panel of each page displays the wild-type log<sub>2</sub>-fold change expression profile for the genes (gray lines) in a single wild-type cluster, overlaid with that cluster's centroid (red line). The bottom panel(s) display the cyclin mutant log<sub>2</sub>-fold change expression profiles (gray lines) and centroids (red line) for all genes in each subcluster associated with the wild-type cluster. Each panel is annotated with the cluster or subcluster name (as labeled in Supplementary Fig. 15), and the average Pearson correlation between all genes displayed. A list of genes in each cluster/subcluster can be found in Supplementary Table 2.

**Wild-type Cluster – B**  
Within cluster Pearson correlation – 0.893

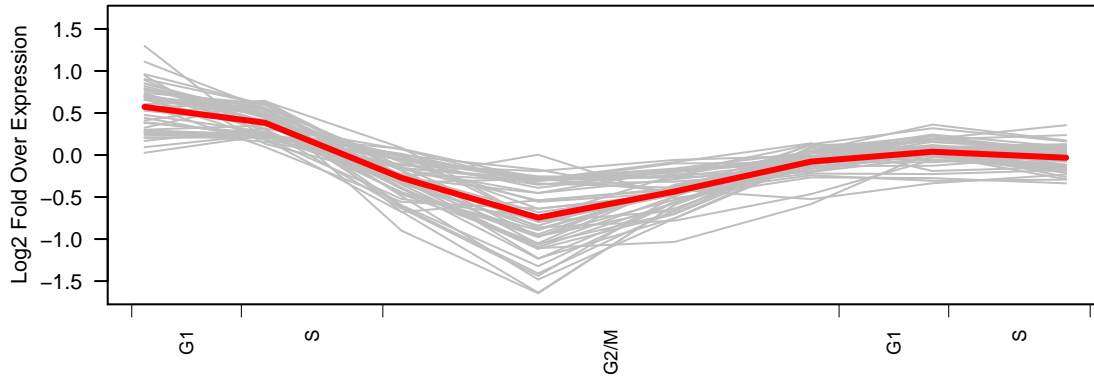

**Sub Clust. 3**  
0.856

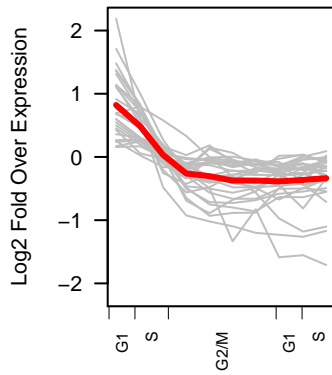

**Sub Clust. 4**  
0.854

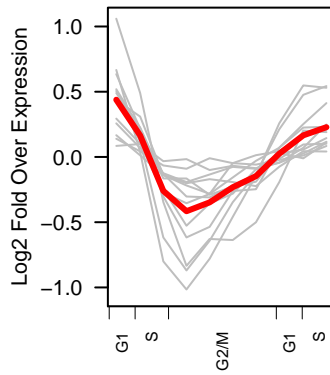

**Sub Clust. 5**  
0.912

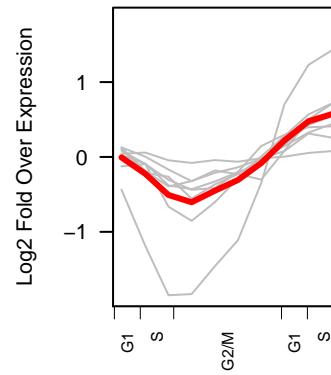

Centroids of clusters from Supplementary Fig. 15

**Wild-type Cluster - C**  
Within cluster Pearson correlation - 0.908

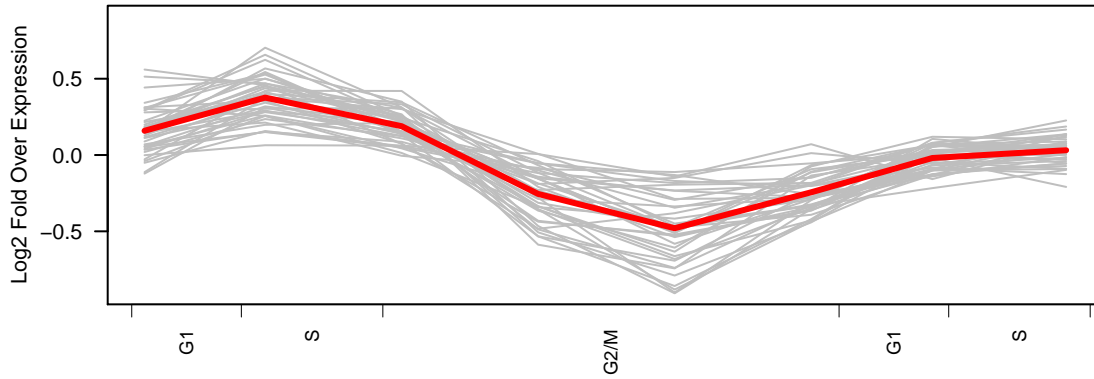

**Sub Clust. 6**  
**0.773**

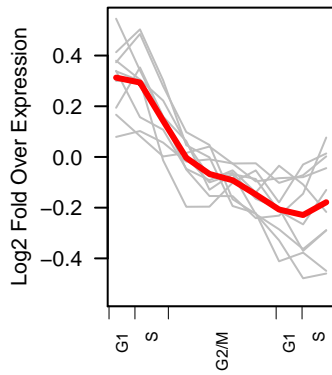

**Sub Clust. 7**  
**0.831**

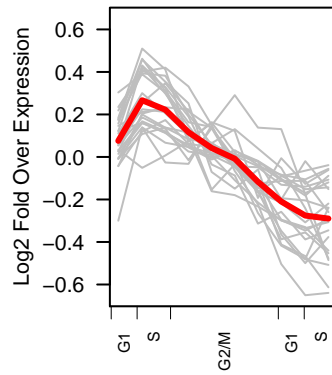

**Sub Clust. 8**  
**0.763**

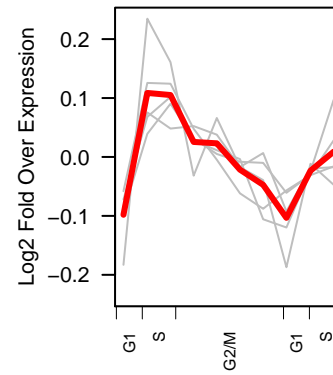

Centroids of clusters from Supplementary Fig. 15

**Wild-type Cluster - D**  
Within cluster Pearson correlation - 0.876

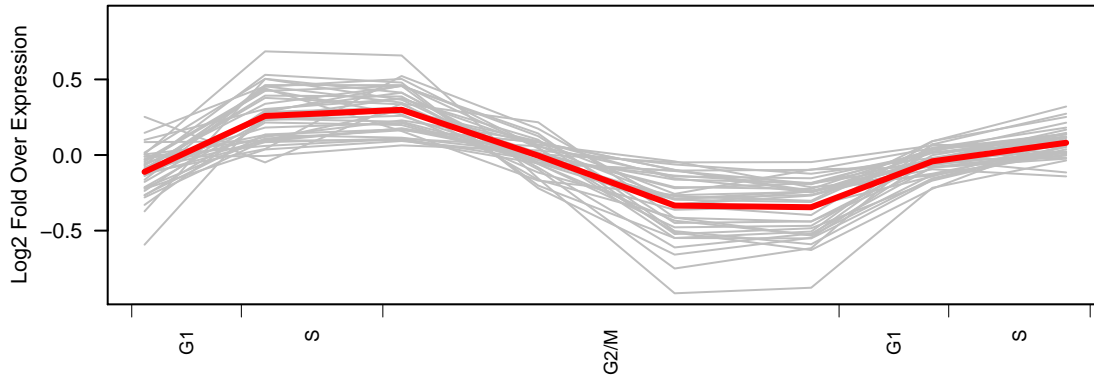

**Sub Clust. 9**  
0.788

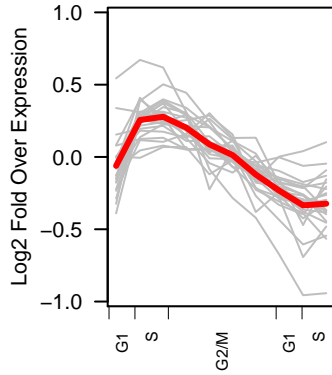

**Sub Clust. 10**  
0.804

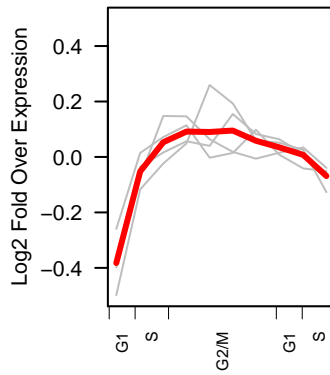

**Sub Clust. 11**  
0.773

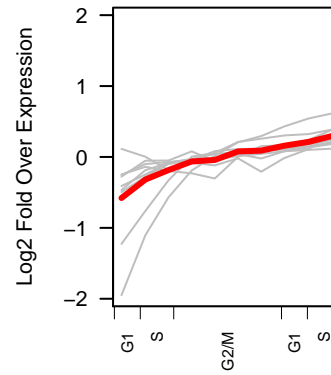

Centroids of clusters from Supplementary Fig. 15

**Wild-type Cluster – E**  
Within cluster Pearson correlation – 0.909

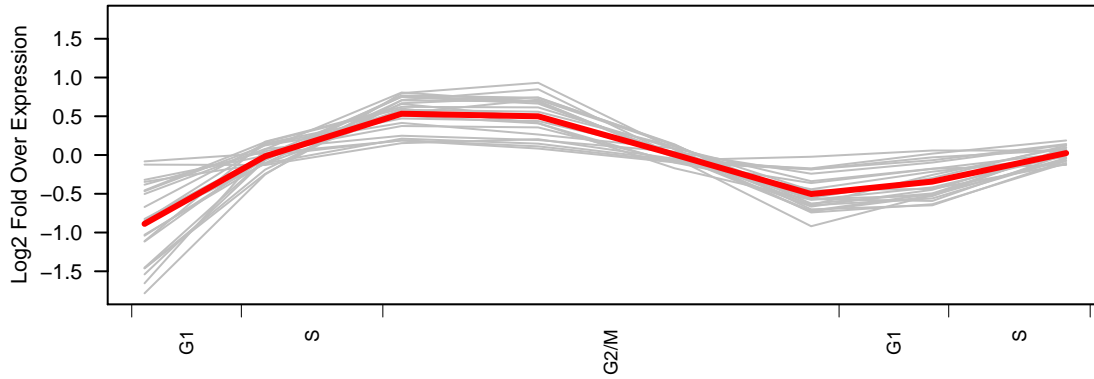

**Sub Clust. 12**  
0.841

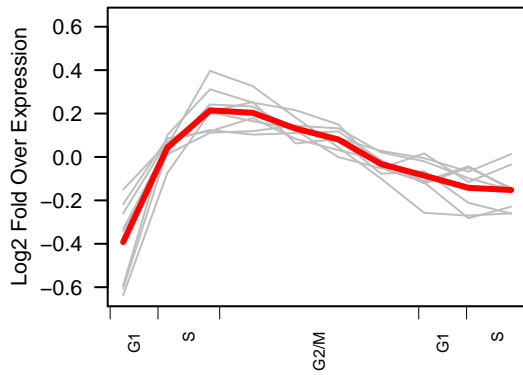

**Sub Clust. 13**  
0.733

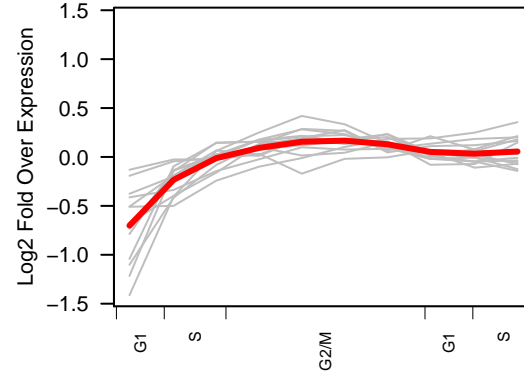

Centroids of clusters from Supplementary Fig. 15

**Wild-type Cluster – F**  
Within cluster Pearson correlation – 0.916

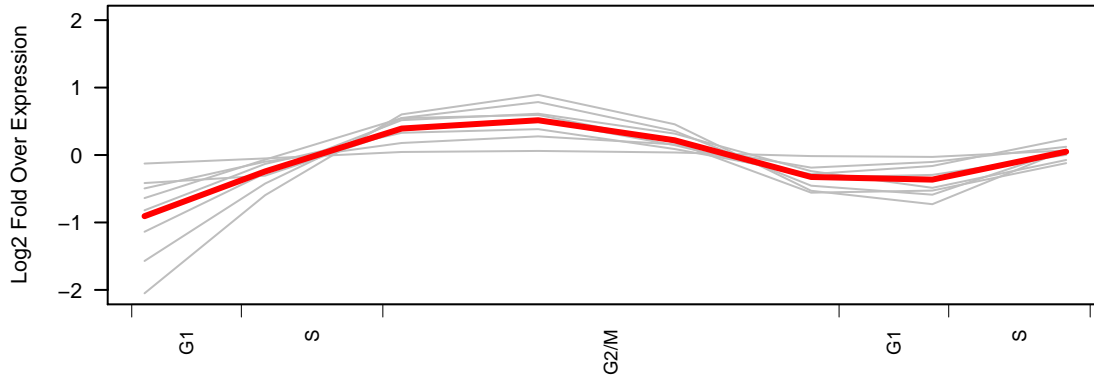

**Sub Clust. 14**  
**0.778**

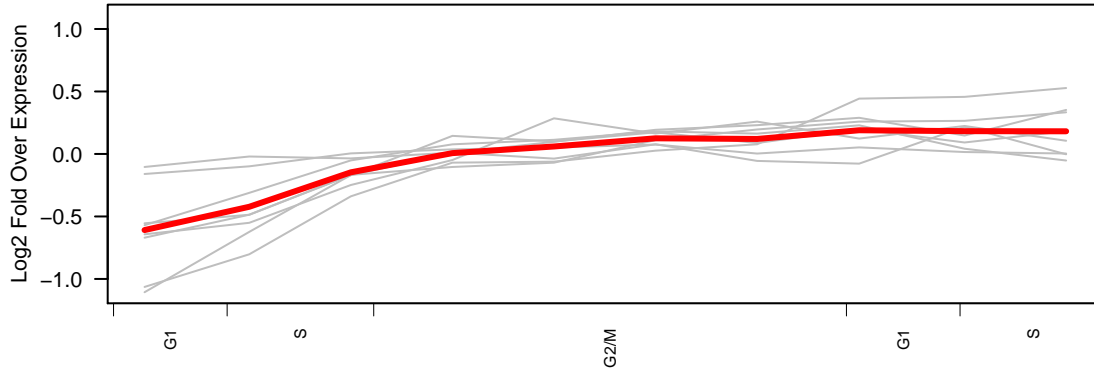

Centroids of clusters from Supplementary Fig. 15

**Wild-type Cluster – G**  
Within cluster Pearson correlation – 0.919

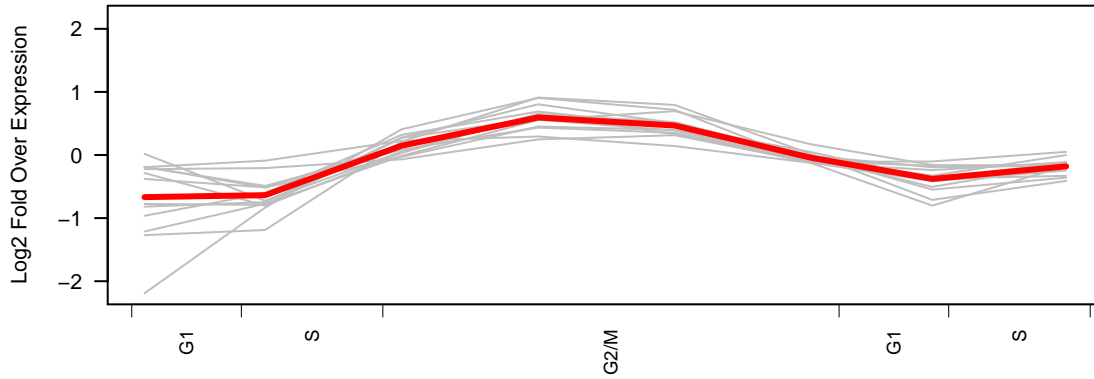

**Sub Clust. 15**  
0.653

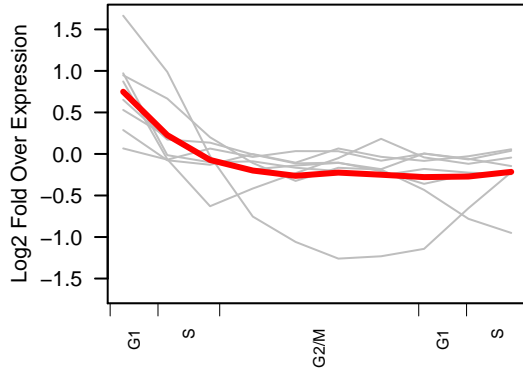

**Sub Clust. 16**  
0.715

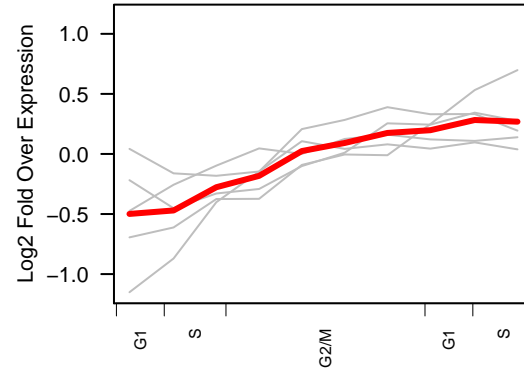

Centroids of clusters from Supplementary Fig. 15

**Wild-type Cluster – H**  
Within cluster Pearson correlation – 0.886

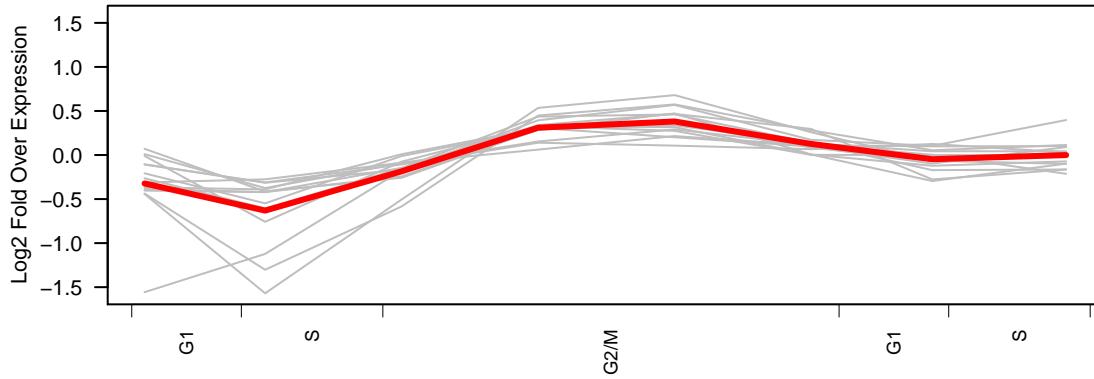

**Sub Clust. 17**  
0.918

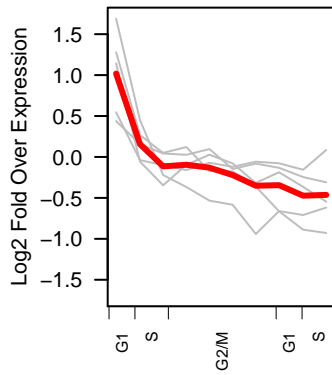

**Sub Clust. 18**  
0.685

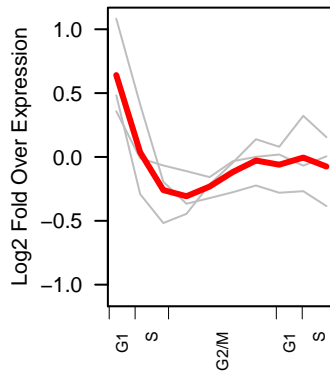

**Sub Clust. 19**  
0.866

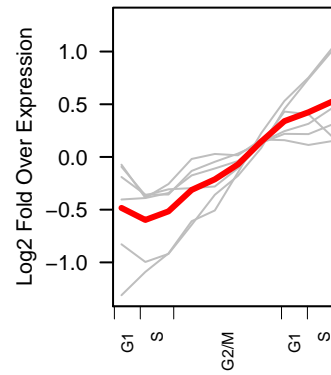

Centroids of clusters from Supplementary Fig. 15



**Wild-type Cluster – I**  
Within cluster Pearson correlation – 0.917

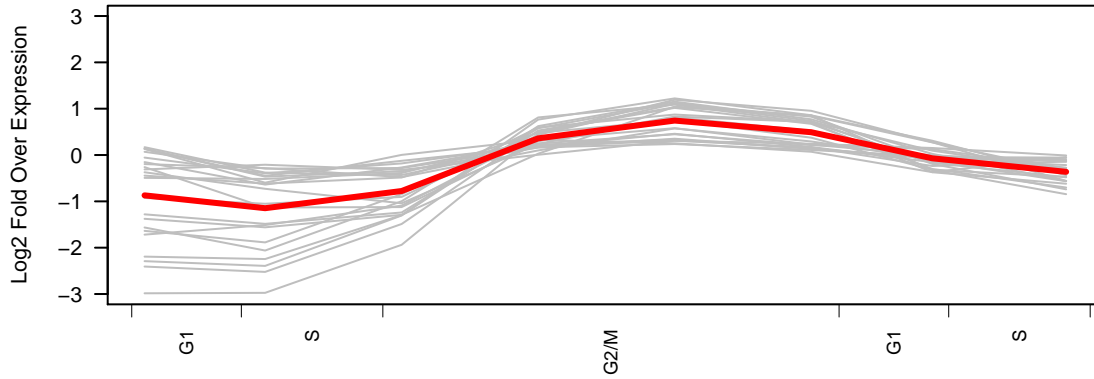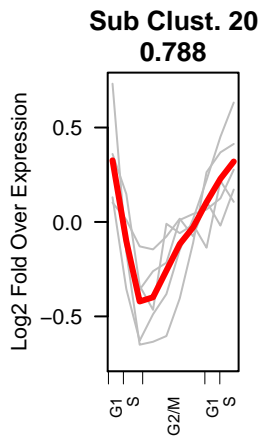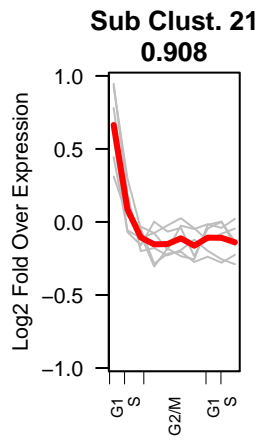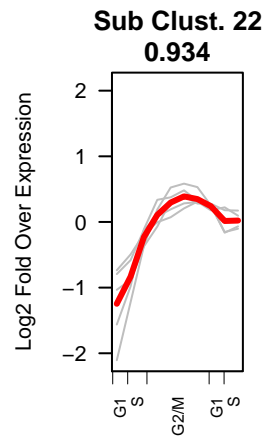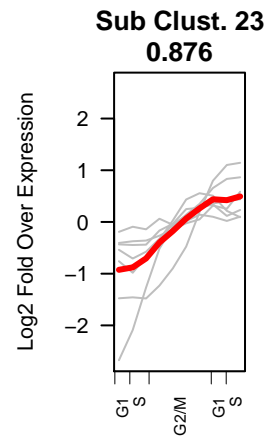

Centroids of clusters from Supplementary Fig. 15

**Wild-type Cluster – J**  
Within cluster Pearson correlation – 0.844

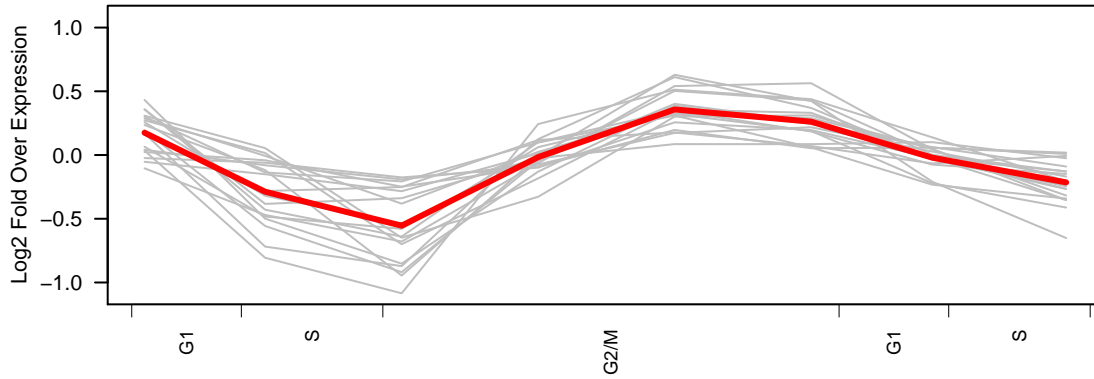

**Sub Clust. 24**  
0.814

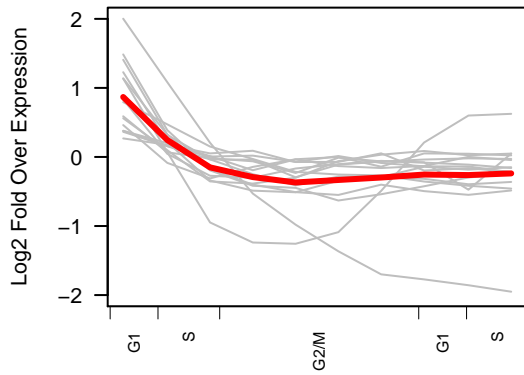

**Sub Clust. 25**  
0.725

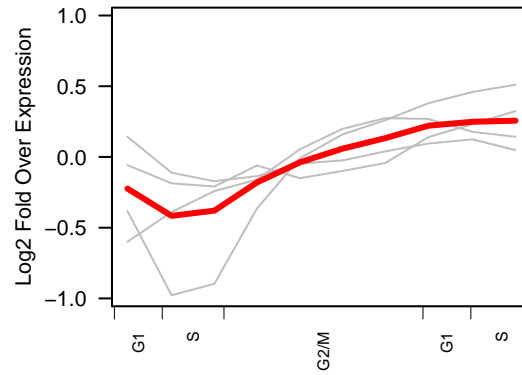

Centroids of clusters from Supplementary Fig. 15

**Wild-type Cluster – K**  
Within cluster Pearson correlation – 0.756

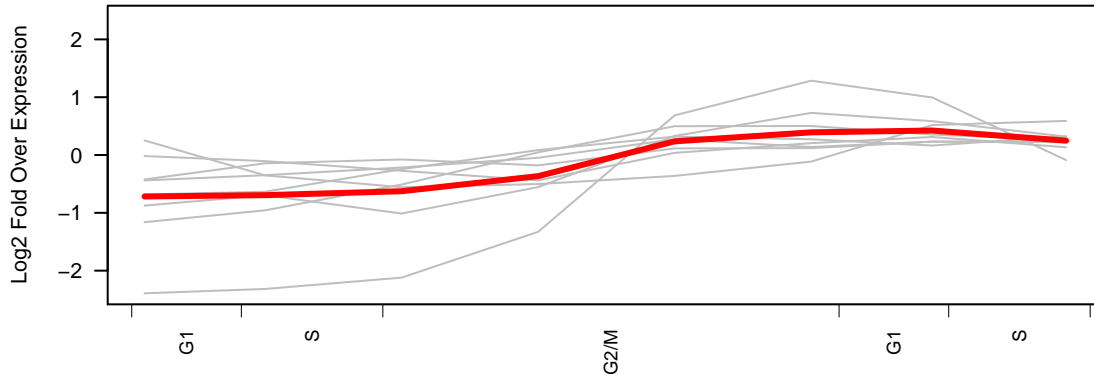

**Sub Clust. 26**  
**0.966**

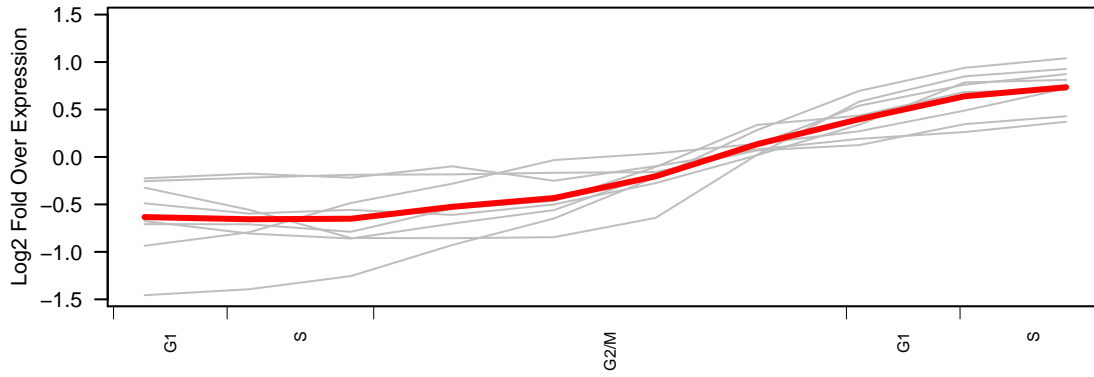

Centroids of clusters from Supplementary Fig. 15
