# Supplementary material
Source: PubMed Central journal article supplement (PMC2736871)
Supplement: NIHMS140055-supplement-supFig_18.pdf [file NIHMS140055-supplement-supFig_18.pdf]

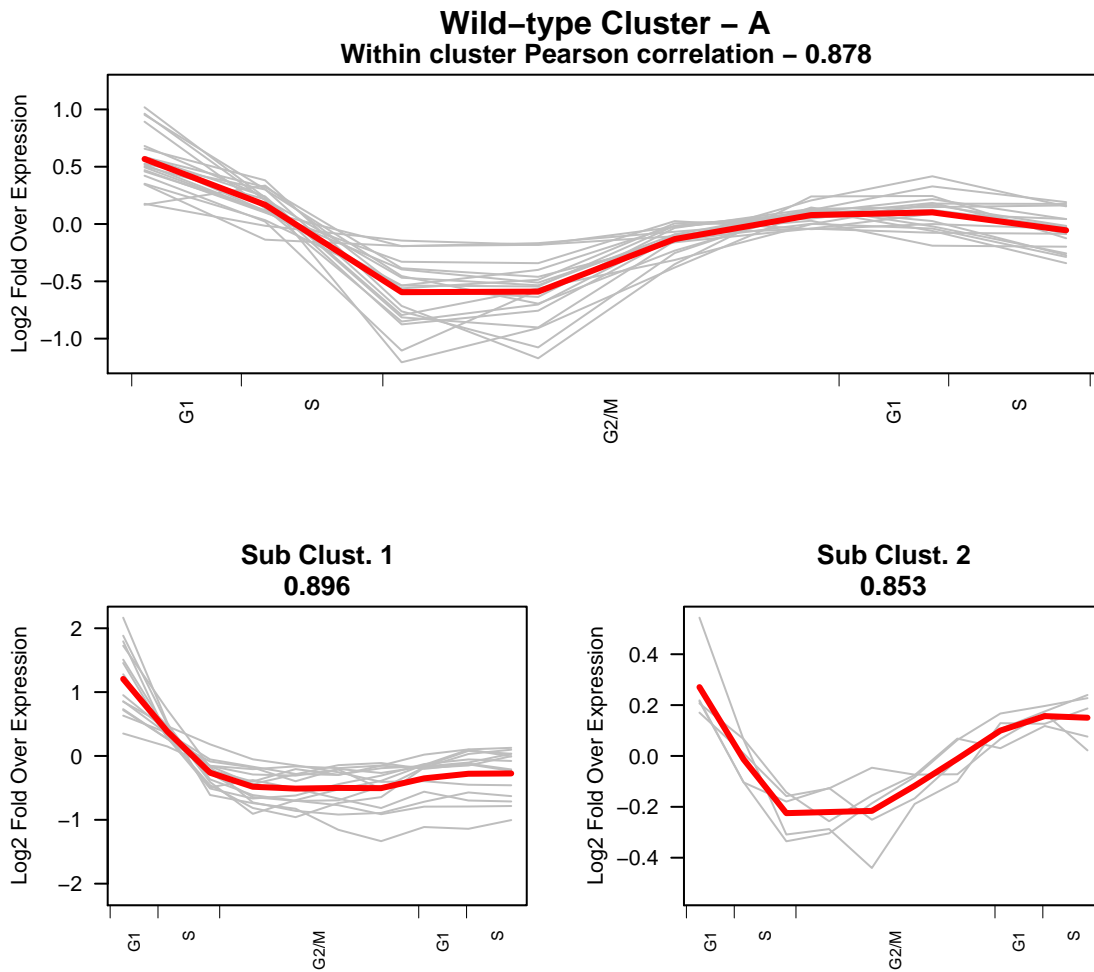

Centroids of clusters from Supplementary Fig. 17

**Figure S18 | Transcript profiles within each wild-type cluster and cyclin mutant sub-cluster from Supplementary Fig. 17 display high Pearson correlation.** The top panel of each page displays the wild-type log<sub>2</sub>-fold change expression profile for the genes (gray lines) in a single wild-type cluster, overlaid with that cluster's centroid (red line). The bottom panel(s) display the cyclin mutant log<sub>2</sub>-fold change expression profiles (gray lines) and centroids (red line) for all genes in each subcluster associated with the wild-type cluster. Each panel is annotated with the cluster or subcluster name (as labeled in Supplementary Fig. 17), and the average Pearson correlation between all genes displayed. A list of genes in each cluster/subcluster can be found in Supplementary Table 2.

**Wild-type Cluster – B**  
Within cluster Pearson correlation – 0.937

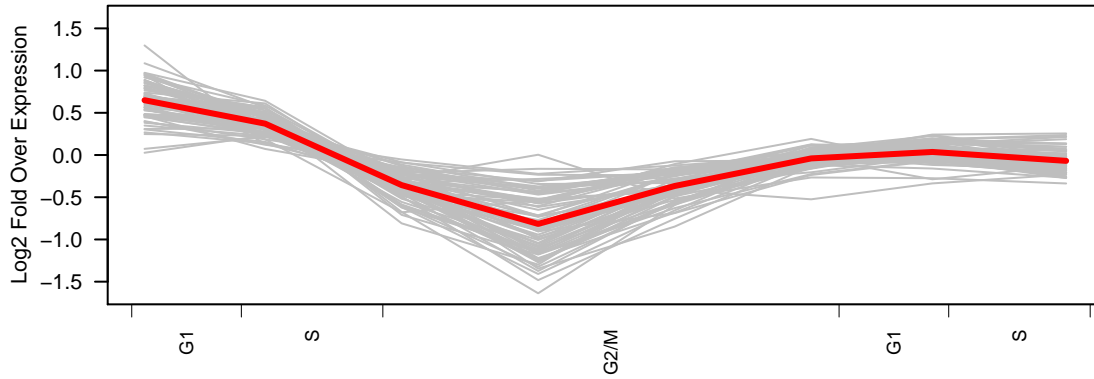

**Sub Clust. 3**  
0.956

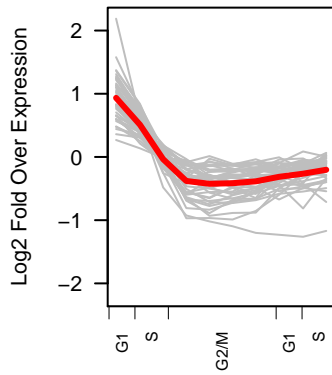

**Sub Clust. 4**  
0.924

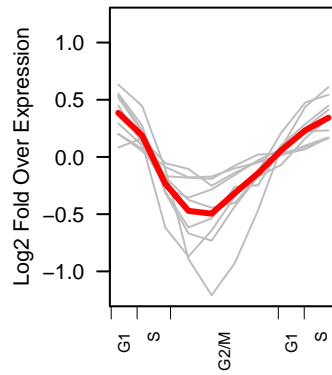

**Sub Clust. 5**  
0.952

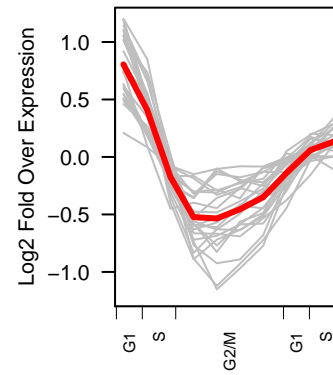

Centroids of clusters from Supplementary Fig. 17

**Wild-type Cluster – C**  
Within cluster Pearson correlation – 0.933

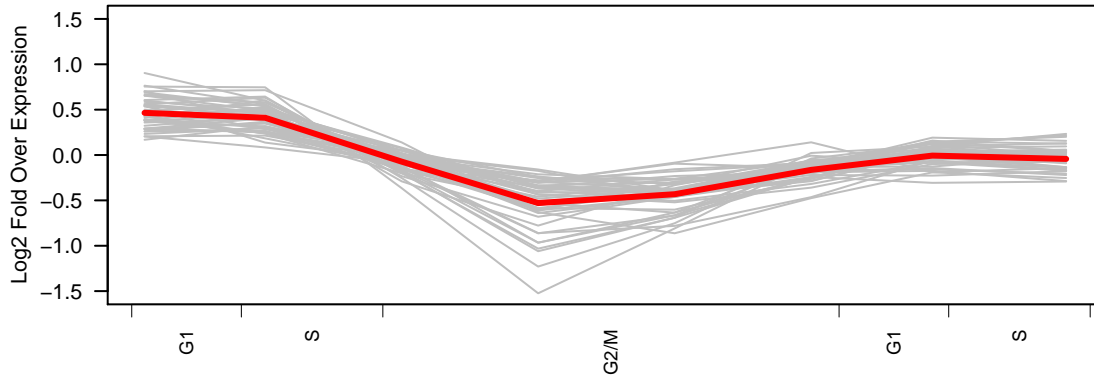

**Sub Clust. 6**  
0.902

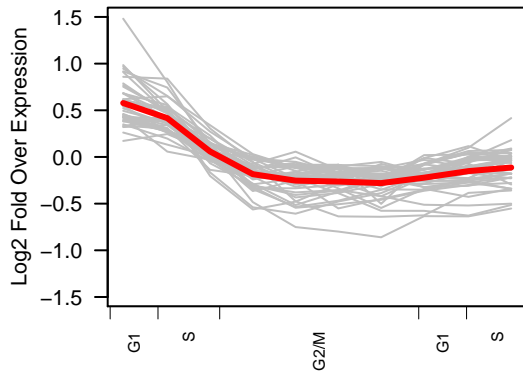

**Sub Clust. 7**  
0.769

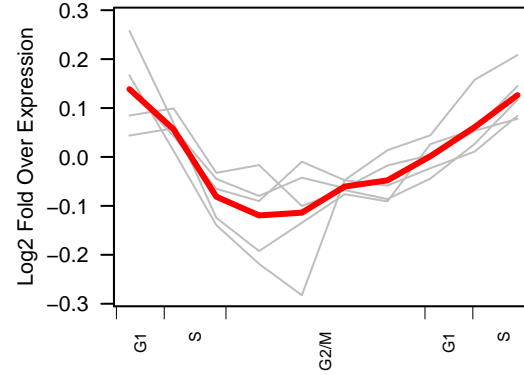

Centroids of clusters from Supplementary Fig. 17

**Wild-type Cluster - D**  
Within cluster Pearson correlation - 0.91

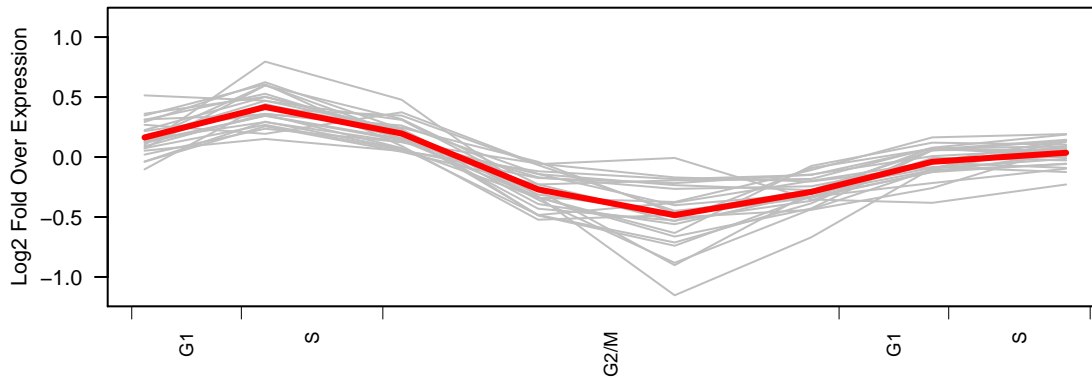

**Sub Clust. 8**  
0.759

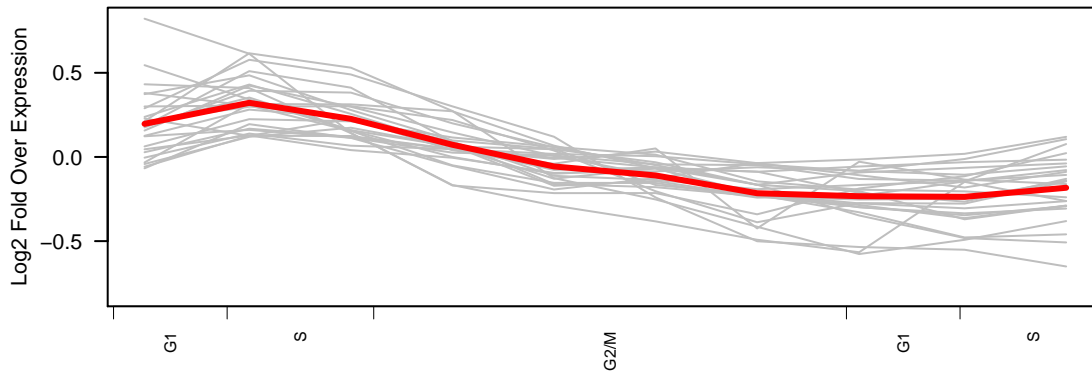

Centroids of clusters from Supplementary Fig. 17

**Wild-type Cluster - E**  
Within cluster Pearson correlation - 0.897

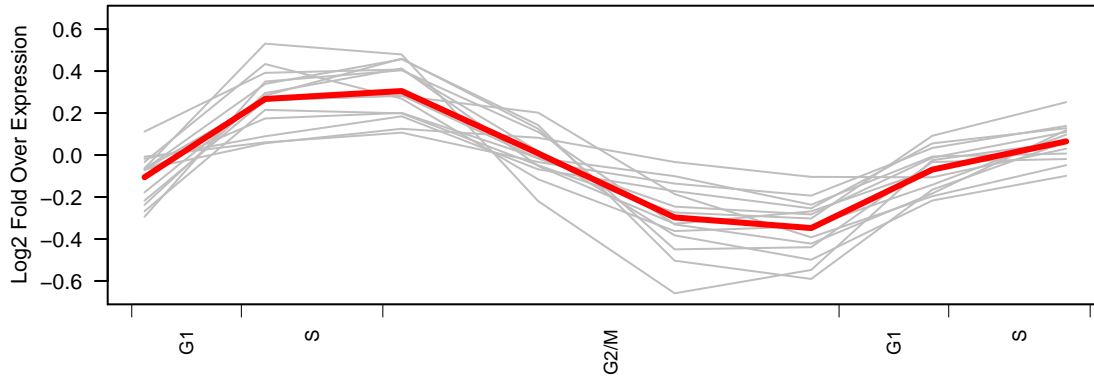

**Sub Clust. 9**  
0.882

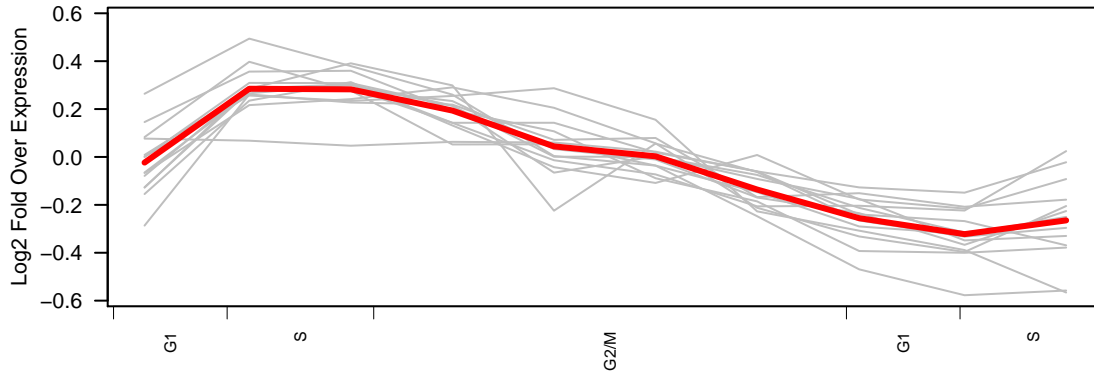

Centroids of clusters from Supplementary Fig. 17

**Wild-type Cluster - F**  
Within cluster Pearson correlation - 0.83

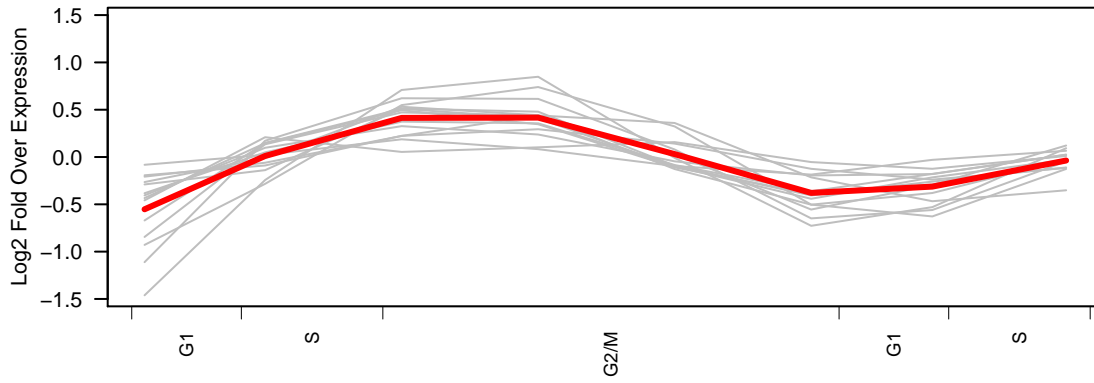

**Sub Clust. 10**  
0.666

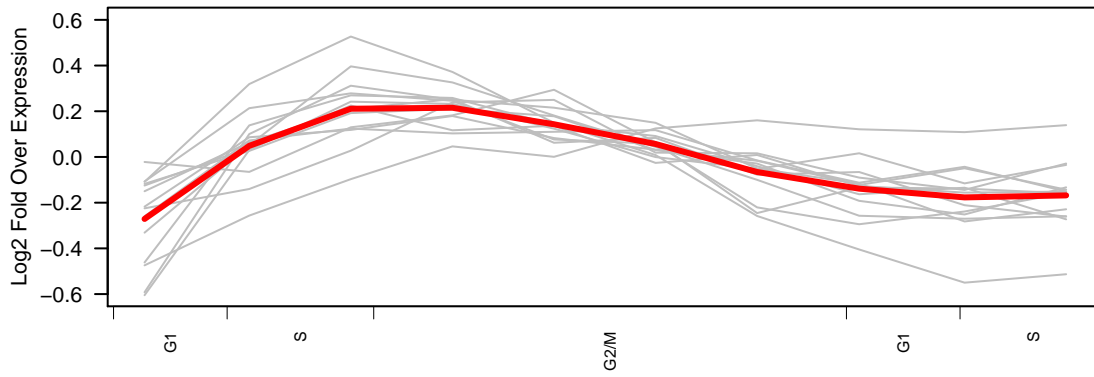

Centroids of clusters from Supplementary Fig. 17

**Wild-type Cluster – G**  
Within cluster Pearson correlation – 0.865

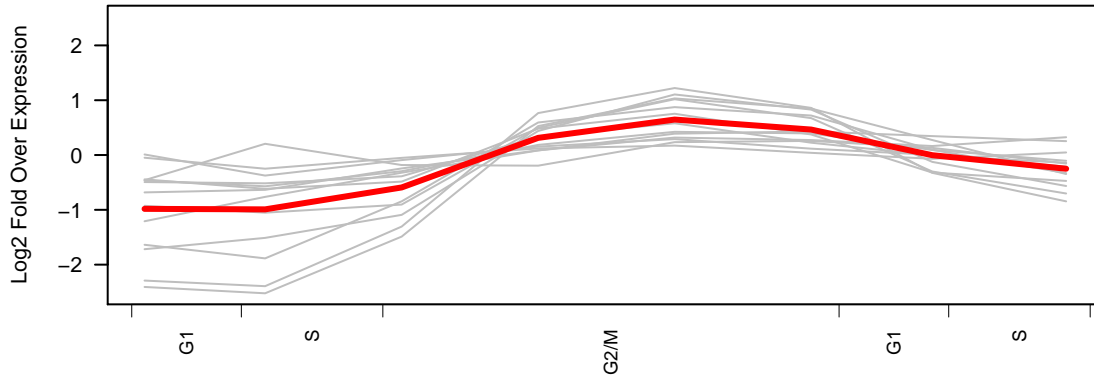

**Sub Clust. 11**  
**0.791**

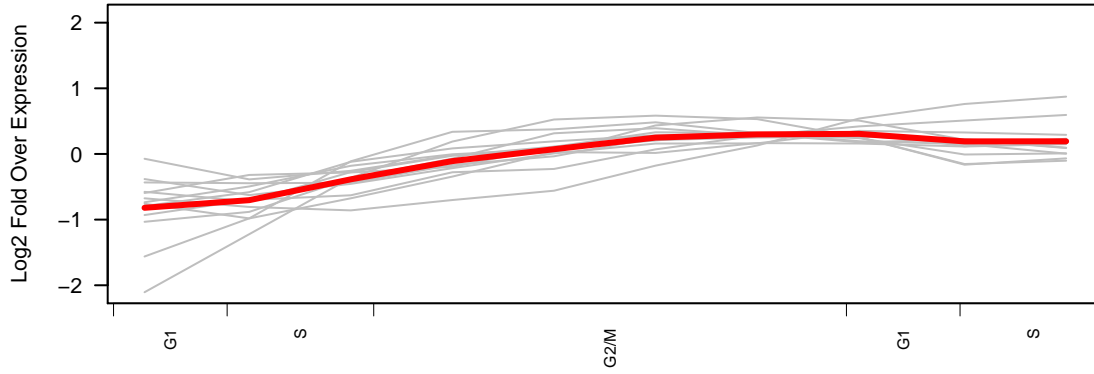

Centroids of clusters from Supplementary Fig. 17

**Wild-type Cluster - H**  
Within cluster Pearson correlation - 0.778

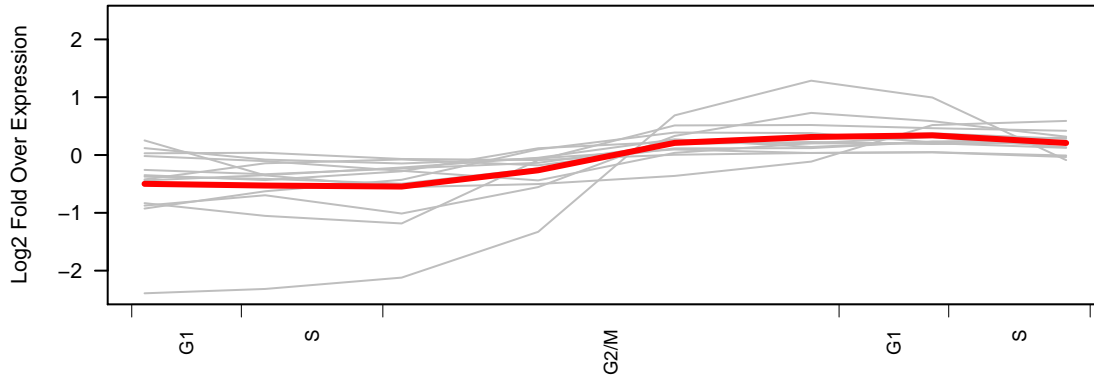

**Sub Clust. 12**  
**0.704**

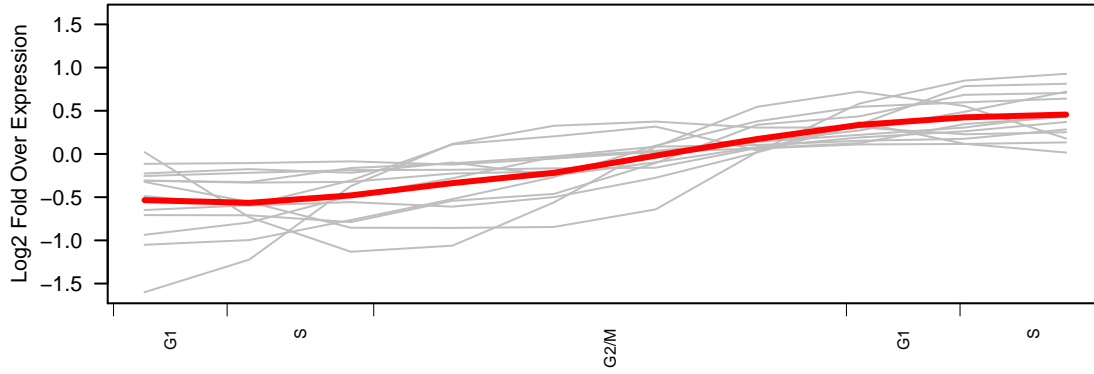

Centroids of clusters from Supplementary Fig. 17



**Wild-type Cluster – I**  
Within cluster Pearson correlation – 0.843

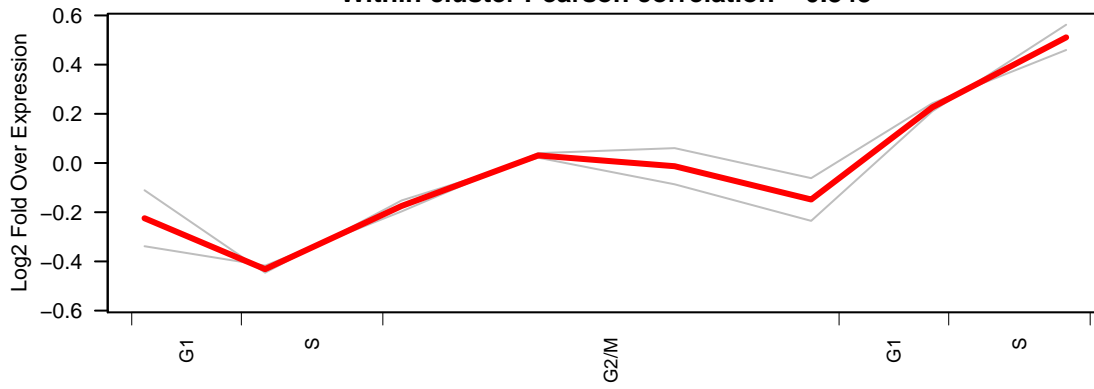

**Sub Clust. 13**  
0.76

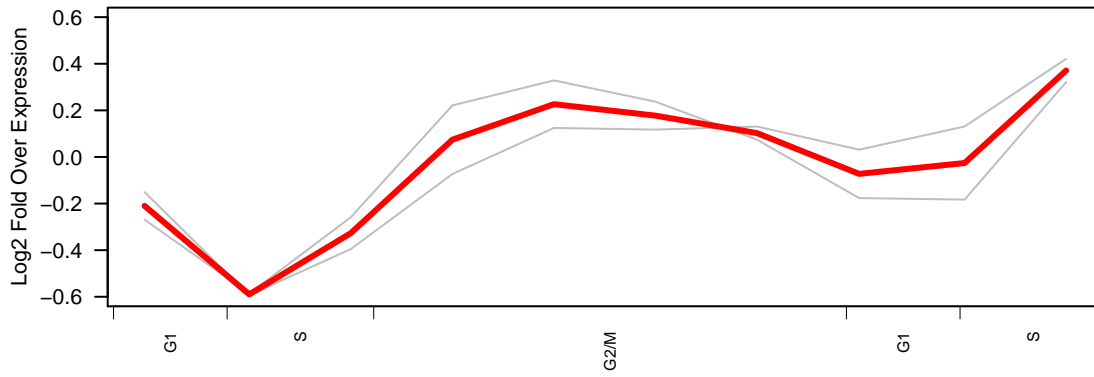

Centroids of clusters from Supplementary Fig. 17
